# Supplementary material for: Age-related collagen turnover of the interstitial matrix and basement membrane: Implications of age- and sex-dependent remodeling of the extracellular matrix
Source: PLoS One. 2018 Mar 29;13(3):e0194458. doi: 10.1371/journal.pone.0194458 (PMC5875766; doi:10.1371/journal.pone.0194458)
Supplement: S1 Data — (XLSX) [file pone.0194458.s002.xlsx]

## Sheet: Data
patient_id	sex	Age at visit	height[cm]	Height M	weight[kg]	BMI	ANALYSIS	PINP RESULT	UNIT	COMMENT PINP	ANALYSIS	C1M RESULT	UNIT	COMMENT C1M	ANALYSIS	C3M RESULT	UNIT	COMMENT C3M	ANALYSIS	Pro-C3 RESULT	UNIT	COMMENT PRO-C3	ANALYSIS	C4M RESULT	UNIT	COMMENT C4M2	ANALYSIS	P4NP7S RESULT	UNIT	COMMENT P4NP7S
1	W	27	166	1.66	59	21.4109	PINP	63.1	NG/ML		C1M	26.9	NG/ML		C3M	7.9	NG/ML		Pro-C3	11.4	NG/ML		C4M2	16.1	NG/ML		P4NP7S	185.7	NG/ML
2	M	27	179	1.79	83	25.9043	PINP	78.8	NG/ML		C1M	20.9	NG/ML		C3M	10.5	NG/ML		Pro-C3	10.7	NG/ML		C4M2	15.9	NG/ML		P4NP7S	225.6	NG/ML
3	W	23	178	1.78	72	22.7244	PINP	85.9	NG/ML		C1M	21.1	NG/ML		C3M	7.5	NG/ML		Pro-C3	16.3	NG/ML		C4M2	11.1	NG/ML		P4NP7S	142.1	NG/ML
4	M	24	172	1.72	59	19.9432	PINP	77.7	NG/ML		C1M	17	NG/ML		C3M	8.7	NG/ML		Pro-C3	6.8	NG/ML		C4M2	14.9	NG/ML		P4NP7S	194.8	NG/ML
5	M	26	175	1.75	75	24.4898	PINP	190.7	NG/ML		C1M	18.2	NG/ML		C3M	6.8	NG/ML		Pro-C3	10	NG/ML		C4M2	11.2	NG/ML		P4NP7S	128.7	NG/ML
6	M	28	174	1.74	62	20.4783	PINP	54.3	NG/ML		C1M	28.7	NG/ML		C3M	7.6	NG/ML		Pro-C3	10.9	NG/ML		C4M2	13.1	NG/ML		P4NP7S	173.6	NG/ML
7	W	31	160	1.6	52.5	20.5078	PINP	30.4	NG/ML		C1M	34.7	NG/ML		C3M	9.6	NG/ML		Pro-C3	6.1	NG/ML		C4M2	14.7	NG/ML		P4NP7S	194.1	NG/ML
8	M	82	170	1.7	70	24.2215	PINP	44.8	NG/ML		C1M	31.9	NG/ML		C3M	8.9	NG/ML		Pro-C3	8.8	NG/ML		C4M2	15.6	NG/ML		P4NP7S	206.9	NG/ML
9	M	30	183	1.83	120	35.8327	PINP	50.6	NG/ML		C1M	28.9	NG/ML		C3M	6.6	NG/ML		Pro-C3	11.9	NG/ML		C4M2	11	NG/ML		P4NP7S	155.1	NG/ML
10	M	85	168	1.68	77	27.2817	PINP	45.3	NG/ML		C1M	28	NG/ML		C3M	9.5	NG/ML		Pro-C3	9.4	NG/ML		C4M2	16.9	NG/ML		P4NP7S	209.3	NG/ML
11	W	25	180	1.8	69	21.2963	PINP	36.1	NG/ML		C1M	24	NG/ML		C3M	10.9	NG/ML		Pro-C3	10.5	NG/ML		C4M2	17.7	NG/ML		P4NP7S	236.4	NG/ML
12	M	82	180	1.8	52	16.0494	PINP	22.6	NG/ML		C1M	29.3	NG/ML		C3M	20.3	NG/ML		Pro-C3	5.5	NG/ML		C4M2	30.9	NG/ML		P4NP7S	485	NG/ML
13	W	27	167	1.67	73	26.1752	PINP	39.9	NG/ML		C1M	29.7	NG/ML		C3M	10.8	NG/ML		Pro-C3	9	NG/ML		C4M2	16.1	NG/ML		P4NP7S	215.2	NG/ML
14	W	26	159	1.59	52.6	20.8061	PINP	58.2	NG/ML		C1M	28.6	NG/ML		C3M	15	NG/ML		Pro-C3	11.1	NG/ML		C4M2	21.3	NG/ML		P4NP7S	350.8	NG/ML
15	W	26	180	1.8	67	20.679	PINP	103.6	NG/ML		C1M	33.1	NG/ML		C3M	13.2	NG/ML		Pro-C3	8.4	NG/ML		C4M2	20.7	NG/ML		P4NP7S	271.3	NG/ML
16	M	24	175	1.75	65	21.2245	PINP	53.6	NG/ML		C1M	29.8	NG/ML		C3M	7.6	NG/ML		Pro-C3	9.4	NG/ML		C4M2	13.8	NG/ML		P4NP7S	174.4	NG/ML
17	M	24	188	1.88	80	22.6347	PINP	82.6	NG/ML		C1M	27.2	NG/ML		C3M	9	NG/ML		Pro-C3	10.1	NG/ML		C4M2	15.9	NG/ML		P4NP7S	216.8	NG/ML
18	W	25	163	1.63	52	19.5717	PINP	46.3	NG/ML		C1M	15.8	NG/ML		C3M	7.1	NG/ML		Pro-C3	7.6	NG/ML		C4M2	11	NG/ML		P4NP7S	149.8	NG/ML
19	W	27	161	1.61	65.6	25.3077	PINP	85.2	NG/ML		C1M	19.5	NG/ML		C3M	7	NG/ML		Pro-C3	10.6	NG/ML		C4M2	11.7	NG/ML		P4NP7S	145.8	NG/ML
20	M	82	171	1.71	63	21.5451	PINP	52.2	NG/ML		C1M	28.2	NG/ML		C3M	9.2	NG/ML		Pro-C3	7.7	NG/ML		C4M2	15.2	NG/ML		P4NP7S	213.2	NG/ML
21	M	30	189	1.89	73	20.4362	PINP	58	NG/ML		C1M	23.9	NG/ML		C3M	7.1	NG/ML		Pro-C3	6.8	NG/ML		C4M2	13.7	NG/ML		P4NP7S	146	NG/ML
22	W	27	166	1.66	62.6	22.7174	PINP	63.2	NG/ML		C1M	29.5	NG/ML		C3M	8.2	NG/ML		Pro-C3	6.3	NG/ML		C4M2	12.8	NG/ML		P4NP7S	162.6	NG/ML
23	M	25	179	1.79	75.9	23.6884	PINP	90.3	NG/ML		C1M	25	NG/ML		C3M	7.9	NG/ML		Pro-C3	11.5	NG/ML		C4M2	15	NG/ML		P4NP7S	168.3	NG/ML
24	W	85	156	1.56	63.6	26.1341	PINP	78.1	NG/ML		C1M	33.5	NG/ML		C3M	10.6	NG/ML		Pro-C3	15.5	NG/ML		C4M2	31.9	NG/ML		P4NP7S	301.4	NG/ML
25	M	25	202	2.02	97	23.7722	PINP	118.2	NG/ML		C1M	21.8	NG/ML		C3M	6.7	NG/ML		Pro-C3	7.8	NG/ML		C4M2	12.6	NG/ML		P4NP7S	152	NG/ML
26	M	25	175	1.75	86	28.0816	PINP	103.7	NG/ML		C1M	30.4	NG/ML		C3M	9.2	NG/ML		Pro-C3	11.1	NG/ML		C4M2	17.2	NG/ML		P4NP7S	224.6	NG/ML
27	M	23	170	1.7	71	24.5675	PINP	90.7	NG/ML		C1M	22.5	NG/ML		C3M	10.2	NG/ML		Pro-C3	10.1	NG/ML		C4M2	17.5	NG/ML		P4NP7S	248	NG/ML
28	W	22	172	1.72	84	28.3937	PINP	107.5	NG/ML		C1M	37.5	NG/ML		C3M	12	NG/ML		Pro-C3	10.3	NG/ML		C4M2	18.4	NG/ML		P4NP7S	263.3	NG/ML
29	W	29	162	1.62	53	20.1951	PINP	27	NG/ML		C1M	34.7	NG/ML		C3M	10.4	NG/ML		Pro-C3	7.1	NG/ML		C4M2	16.2	NG/ML		P4NP7S	199.8	NG/ML
30	M	23	171	1.71	58	19.8352	PINP	125.9	NG/ML		C1M	26.8	NG/ML		C3M	9.9	NG/ML		Pro-C3	8	NG/ML		C4M2	15.2	NG/ML		P4NP7S	195.3	NG/ML
31	W	85	159	1.59	70	27.6888	PINP	49.5	NG/ML		C1M	14.8	NG/ML		C3M	7.3	NG/ML		Pro-C3	8.6	NG/ML		C4M2	14.2	NG/ML		P4NP7S	159.9	NG/ML
32	M	84	167	1.67	62	22.231	PINP	49.5	NG/ML		C1M	23.3	NG/ML		C3M	10.3	NG/ML		Pro-C3	7.6	NG/ML		C4M2	18.2	NG/ML		P4NP7S	256	NG/ML
33	W	30	169	1.69	60	21.0077	PINP	40.8	NG/ML		C1M	20.5	NG/ML		C3M	11.5	NG/ML		Pro-C3	6.1	NG/ML		C4M2	18.9	NG/ML		P4NP7S	266.9	NG/ML
34	M	84	161	1.61	65.6	25.3077	PINP	36.9	NG/ML		C1M	30.8	NG/ML		C3M	6.3	NG/ML		Pro-C3	5.8	NG/ML		C4M2	14.1	NG/ML		P4NP7S	154	NG/ML
35	M	82	180	1.8	78	24.0741	PINP	18	NG/ML		C1M	27.2	NG/ML		C3M	7.7	NG/ML		Pro-C3	9	NG/ML		C4M2	13.3	NG/ML		P4NP7S	158.3	NG/ML
36	M	24	183	1.83	80	23.8884	PINP	59.4	NG/ML		C1M	26.3	NG/ML		C3M	8.6	NG/ML		Pro-C3	7.9	NG/ML		C4M2	17	NG/ML		P4NP7S	194.6	NG/ML
37	M	83	178	1.78	97.6	30.8042	PINP	48.8	NG/ML		C1M	17.8	NG/ML		C3M	10.9	NG/ML		Pro-C3	7.9	NG/ML		C4M2	15.2	NG/ML		P4NP7S	249.2	NG/ML
38	M	81	172	1.72	77.2	26.0952	PINP	63.9	NG/ML		C1M	24.1	NG/ML		C3M	11.6	NG/ML		Pro-C3	11.7	NG/ML		C4M2	18.1	NG/ML		P4NP7S	266.7	NG/ML
39	M	84	178	1.78	76	23.9869	PINP	31.8	NG/ML		C1M	24.2	NG/ML		C3M	13.3	NG/ML		Pro-C3	7	NG/ML		C4M2	26.4	NG/ML		P4NP7S	350.1	NG/ML
40	M	24	175	1.75	83.5	27.2653	PINP	79.1	NG/ML		C1M	19.1	NG/ML		C3M	11.3	NG/ML		Pro-C3	7.3	NG/ML		C4M2	15.9	NG/ML		P4NP7S	262.7	NG/ML
41	W	25	170	1.7	70	24.2215	PINP	69.3	NG/ML		C1M	32.4	NG/ML		C3M	11.6	NG/ML		Pro-C3	11.7	NG/ML		C4M2	16.5	NG/ML		P4NP7S	256.4	NG/ML
42	M	26	178	1.78	70	22.0932	PINP	131.7	NG/ML		C1M	34.1	NG/ML		C3M	8.6	NG/ML		Pro-C3	7.9	NG/ML		C4M2	15	NG/ML		P4NP7S	184.2	NG/ML
43	W	29	170	1.7	56	19.3772	PINP	43.7	NG/ML		C1M	23.9	NG/ML		C3M	11.1	NG/ML		Pro-C3	6.5	NG/ML		C4M2	19.3	NG/ML		P4NP7S	226.8	NG/ML
44	M	22	197	1.97	103	26.5402	PINP	164.3	NG/ML		C1M	27.3	NG/ML		C3M	12.3	NG/ML		Pro-C3	12	NG/ML		C4M2	19.9	NG/ML		P4NP7S	293	NG/ML
45	M	24	187	1.87	89	25.4511	PINP	54.2	NG/ML		C1M	17.7	NG/ML		C3M	9.5	NG/ML		Pro-C3	11.9	NG/ML		C4M2	17.2	NG/ML		P4NP7S	243	NG/ML
46	M	24	181	1.81	78.9	24.0835	PINP	61.9	NG/ML		C1M	17.4	NG/ML		C3M	9.5	NG/ML		Pro-C3	7.1	NG/ML		C4M2	13.9	NG/ML		P4NP7S	199.5	NG/ML
47	M	24	192	1.92	78	21.1589	PINP	91.8	NG/ML		C1M	31.9	NG/ML		C3M	10	NG/ML		Pro-C3	11.9	NG/ML		C4M2	14.7	NG/ML		P4NP7S	213.2	NG/ML
48	M	23	170	1.7	72.7	25.1557	PINP	72.2	NG/ML		C1M	23.2	NG/ML		C3M	9.9	NG/ML		Pro-C3	8.1	NG/ML		C4M2	15.1	NG/ML		P4NP7S	220	NG/ML
49	M	82	163	1.63	67	25.2174	PINP	84.3	NG/ML		C1M	25.1	NG/ML		C3M	11.9	NG/ML		Pro-C3	8.7	NG/ML		C4M2	17.2	NG/ML		P4NP7S	203.8	NG/ML
50	M	81	181	1.81	93	28.3874	PINP	72.3	NG/ML		C1M	31.1	NG/ML		C3M	10.7	NG/ML		Pro-C3	8.6	NG/ML		C4M2	16.1	NG/ML		P4NP7S	227.3	NG/ML
51	M	82	178	1.78	82	25.8806	PINP	55.2	NG/ML		C1M	30	NG/ML		C3M	12.7	NG/ML		Pro-C3	6.5	NG/ML		C4M2	18.1	NG/ML		P4NP7S	288.1	NG/ML
52	W	83	155	1.55	69.1	28.7617	PINP	82.1	NG/ML		C1M	38.4	NG/ML		C3M	13.2	NG/ML		Pro-C3	27.3	NG/ML		C4M2	22.6	NG/ML		P4NP7S	309.3	NG/ML
53	M	25	168	1.68	61	21.6128	PINP	141.3	NG/ML		C1M	17.1	NG/ML		C3M	10	NG/ML		Pro-C3	8.8	NG/ML		C4M2	14	NG/ML		P4NP7S	185.3	NG/ML
54	W	23	184	1.84	71	20.9712	PINP	78.7	NG/ML		C1M	18.4	NG/ML		C3M	12	NG/ML		Pro-C3	9.1	NG/ML		C4M2	17.4	NG/ML		P4NP7S	232.9	NG/ML
55	M	82	181	1.81	88.7	27.0749	PINP	110.3	NG/ML		C1M	13.2	NG/ML	BELOW LOWER LIMIT OF QUANTIFICATION	C3M	11.1	NG/ML		Pro-C3	6.5	NG/ML		C4M2	16.6	NG/ML		P4NP7S	218.8	NG/ML
56	M	84	175	1.75	83	27.102	PINP	44.6	NG/ML		C1M	27.3	NG/ML		C3M	7.9	NG/ML		Pro-C3	8.9	NG/ML		C4M2	12.3	NG/ML		P4NP7S	147.8	NG/ML
57	M	29	173	1.73	70.7	23.6226	PINP	47.3	NG/ML		C1M	26.7	NG/ML		C3M	9.1	NG/ML		Pro-C3	7.9	NG/ML		C4M2	12	NG/ML		P4NP7S	155.8	NG/ML
58	M	31	164	1.64	87	32.3468	PINP	45.5	NG/ML		C1M	49.9	NG/ML		C3M	12.6	NG/ML		Pro-C3	9.7	NG/ML		C4M2	21.1	NG/ML		P4NP7S	317.5	NG/ML
59	W	26	167	1.67	51.6	18.5019	PINP	103.3	NG/ML		C1M	28.6	NG/ML		C3M	9.6	NG/ML		Pro-C3	9.7	NG/ML		C4M2	16.2	NG/ML		P4NP7S	216.6	NG/ML
60	M	31	178	1.78	74	23.3556	PINP	127.9	NG/ML		C1M	17.7	NG/ML		C3M	10.4	NG/ML		Pro-C3	9.1	NG/ML		C4M2	17	NG/ML		P4NP7S	258.7	NG/ML
61	W	25	163	1.63	74	27.852	PINP	53.2	NG/ML		C1M	32.8	NG/ML		C3M	15.8	NG/ML		Pro-C3	8	NG/ML		C4M2	24.6	NG/ML		P4NP7S	391.6	NG/ML
62	M	30	176	1.76	86.8	28.0217	PINP	87.3	NG/ML		C1M	14.6	NG/ML		C3M	13.1	NG/ML		Pro-C3	7.9	NG/ML		C4M2	17.3	NG/ML		P4NP7S	280.9	NG/ML
63	W	24	169	1.69	63	22.0581	PINP	29.3	NG/ML		C1M		NG/ML		C3M	12.2	NG/ML		Pro-C3	5.3	NG/ML		C4M2	21.8	NG/ML		P4NP7S	289.2	NG/ML
64	M	31	178	1.78	82	25.8806	PINP	41.9	NG/ML		C1M	22.8	NG/ML		C3M	15.3	NG/ML		Pro-C3	9.8	NG/ML		C4M2	20.9	NG/ML		P4NP7S	338.1	NG/ML
65	W	25	157	1.57	57.4	23.2869	PINP	70.6	NG/ML		C1M	25.5	NG/ML		C3M	8	NG/ML		Pro-C3	8.6	NG/ML		C4M2	10.5	NG/ML		P4NP7S	156.4	NG/ML
66	M	82	179	1.79	83	25.9043	PINP	31.4	NG/ML		C1M	22.6	NG/ML		C3M	13.2	NG/ML		Pro-C3	9.6	NG/ML		C4M2	21.1	NG/ML		P4NP7S	320.9	NG/ML
67	W	25	165	1.65	58.8	21.5978	PINP	64.7	NG/ML		C1M	24.7	NG/ML		C3M	12.3	NG/ML		Pro-C3	7.8	NG/ML		C4M2	22.3	NG/ML		P4NP7S	326.9	NG/ML
68	M	83	181	1.81	98.9	30.1883	PINP	95.6	NG/ML		C1M	19.4	NG/ML		C3M	8.4	NG/ML		Pro-C3	12.2	NG/ML		C4M2	14.9	NG/ML		P4NP7S	190.8	NG/ML
69	M	83	177	1.77	79.6	25.4078	PINP	30.3	NG/ML		C1M	40.3	NG/ML		C3M	6.2	NG/ML		Pro-C3	11.1	NG/ML		C4M2	12.7	NG/ML		P4NP7S	137.5	NG/ML
70	M	84	177	1.77	82	26.1738	PINP	35.6	NG/ML		C1M	25.1	NG/ML		C3M	12	NG/ML		Pro-C3	12.1	NG/ML		C4M2	18.5	NG/ML		P4NP7S	290.9	NG/ML
71	M	31	181	1.81	78	23.8088	PINP	82.3	NG/ML		C1M	18.2	NG/ML		C3M	9.1	NG/ML		Pro-C3	7.3	NG/ML		C4M2	17.6	NG/ML		P4NP7S	219	NG/ML
72	M	24	178	1.78	72.6	22.9138	PINP	93.1	NG/ML		C1M	23.6	NG/ML		C3M	13.8	NG/ML		Pro-C3	12.2	NG/ML		C4M2	22	NG/ML		P4NP7S	344.7	NG/ML
73	M	82	179	1.79	65.8	20.5362	PINP	88.9	NG/ML		C1M	25.6	NG/ML		C3M	9.1	NG/ML		Pro-C3	11.1	NG/ML		C4M2	16.7	NG/ML		P4NP7S	197.9	NG/ML
74	M	82	182	1.82	96	28.982	PINP	63.8	NG/ML		C1M	36.8	NG/ML		C3M	11.5	NG/ML		Pro-C3	12.3	NG/ML		C4M2	20.4	NG/ML		P4NP7S	249.2	NG/ML
75	M	25	182	1.82	81	24.4536	PINP	51.2	NG/ML		C1M	22.1	NG/ML		C3M	10.1	NG/ML		Pro-C3	6.5	NG/ML		C4M2	17.9	NG/ML		P4NP7S	221.6	NG/ML
76	W	27	170	1.7	61.5	21.2803	PINP	17.3	NG/ML		C1M	34.6	NG/ML		C3M	10.8	NG/ML		Pro-C3	5.9	NG/ML		C4M2	16.8	NG/ML		P4NP7S	209.5	NG/ML
77	W	28	165	1.65	53.2	19.5409	PINP	88.1	NG/ML		C1M	24.6	NG/ML		C3M	10.6	NG/ML		Pro-C3	6	NG/ML		C4M2	18	NG/ML		P4NP7S	196.8	NG/ML
78	M	86	163	1.63	59.7	22.4698	PINP	44.8	NG/ML		C1M	25.7	NG/ML		C3M	17.6	NG/ML		Pro-C3	6.8	NG/ML		C4M2	25.1	NG/ML		P4NP7S	394	NG/ML
79	W	86	160	1.6	62.9	24.5703	PINP	38.1	NG/ML		C1M	30.8	NG/ML		C3M	11.4	NG/ML		Pro-C3	7	NG/ML		C4M2	21.2	NG/ML		P4NP7S	234.2	NG/ML
80	M	83	174	1.74	85	28.075	PINP	50.8	NG/ML		C1M	22.8	NG/ML		C3M	8.2	NG/ML		Pro-C3	9	NG/ML		C4M2	12.1	NG/ML		P4NP7S	172	NG/ML
81	M	27	173	1.73	80	26.7299	PINP	61.3	NG/ML		C1M	28.1	NG/ML		C3M	9.2	NG/ML		Pro-C3	7.8	NG/ML		C4M2	13.4	NG/ML		P4NP7S	186.7	NG/ML
82	M	24	186	1.86	70	20.2336	PINP	93.5	NG/ML		C1M	25.6	NG/ML		C3M	10.6	NG/ML		Pro-C3	9.8	NG/ML		C4M2	14	NG/ML		P4NP7S	201	NG/ML
83	M	30	178	1.78	74	23.3556	PINP	74	NG/ML		C1M	22.8	NG/ML		C3M	8.7	NG/ML		Pro-C3	7.5	NG/ML		C4M2	14.5	NG/ML		P4NP7S	191	NG/ML
84	W	28	157	1.57	57	23.1247	PINP	57.8	NG/ML		C1M	23	NG/ML		C3M	12.7	NG/ML		Pro-C3	10.5	NG/ML		C4M2	17.1	NG/ML		P4NP7S	200.8	NG/ML
85	W	85	159	1.59	64	25.3155	PINP	75.4	NG/ML		C1M	25.6	NG/ML		C3M	8.9	NG/ML		Pro-C3	9.7	NG/ML		C4M2	15.1	NG/ML		P4NP7S	164.4	NG/ML
86	W	82	165	1.65	66	24.2424	PINP	82.4	NG/ML		C1M	40.2	NG/ML		C3M	12.4	NG/ML		Pro-C3	9.6	NG/ML		C4M2	18.9	NG/ML		P4NP7S	225	NG/ML
87	W	30	186	1.86	83.5	24.1357	PINP	62.3	NG/ML		C1M	27.7	NG/ML		C3M	10.9	NG/ML		Pro-C3	7	NG/ML		C4M2	17.7	NG/ML		P4NP7S	216.4	NG/ML
88	W	27	175	1.75	67.7	22.1061	PINP	46.9	NG/ML		C1M	19.1	NG/ML		C3M	7.4	NG/ML		Pro-C3	6.8	NG/ML		C4M2	12.5	NG/ML		P4NP7S	154.9	NG/ML
89	W	23	158	1.58	51	20.4294	PINP	57.9	NG/ML		C1M	26.8	NG/ML		C3M	11.7	NG/ML		Pro-C3	12.3	NG/ML		C4M2	19.1	NG/ML		P4NP7S	244.3	NG/ML
90	W	29	159	1.59	60.5	23.931	PINP	45.8	NG/ML		C1M	30.6	NG/ML		C3M	11.9	NG/ML		Pro-C3	9.3	NG/ML		C4M2	18.2	NG/ML		P4NP7S	206.3	NG/ML
91	M	25	180	1.8	69.5	21.4506	PINP	108.8	NG/ML		C1M	21	NG/ML		C3M	9.9	NG/ML		Pro-C3	8.1	NG/ML		C4M2	15.5	NG/ML		P4NP7S	174.7	NG/ML
92	W	24	168	1.68	62.8	22.2506	PINP	64.5	NG/ML		C1M	20.4	NG/ML		C3M	9.7	NG/ML		Pro-C3	9.1	NG/ML		C4M2	15.7	NG/ML		P4NP7S	178.5	NG/ML
93	M	31	182	1.82	81.1	24.4838	PINP	67.3	NG/ML		C1M	27.4	NG/ML		C3M	10.5	NG/ML		Pro-C3	7.3	NG/ML		C4M2	15.6	NG/ML		P4NP7S	212.2	NG/ML
94	W	25	175	1.75	72	23.5102	PINP	39.8	NG/ML		C1M	24.1	NG/ML		C3M	8.3	NG/ML		Pro-C3	7	NG/ML		C4M2	14	NG/ML		P4NP7S	145.8	NG/ML
95	M	82	176	1.76	90	29.0548	PINP	25.3	NG/ML		C1M	21.1	NG/ML		C3M	9.6	NG/ML		Pro-C3	11.1	NG/ML		C4M2	14.3	NG/ML		P4NP7S	191.8	NG/ML
96	M	25	182	1.82	89	26.8687	PINP	116.6	NG/ML		C1M	16.3	NG/ML		C3M	11.9	NG/ML		Pro-C3	6.8	NG/ML		C4M2	19.8	NG/ML		P4NP7S	231.2	NG/ML
97	W	23	166	1.66	59	21.4109	PINP	40.8	NG/ML		C1M	38.3	NG/ML		C3M	11.6	NG/ML		Pro-C3	5.4	NG/ML		C4M2	18.2	NG/ML		P4NP7S	246	NG/ML
98	W	23	178	1.78	105	33.1398	PINP	42.1	NG/ML		C1M		NG/ML		C3M	13.7	NG/ML		Pro-C3	7.8	NG/ML		C4M2	24.1	NG/ML		P4NP7S	286.3	NG/ML
99	M	22	180	1.8	75	23.1481	PINP	99.5	NG/ML		C1M	20.9	NG/ML		C3M	8.4	NG/ML		Pro-C3	7.8	NG/ML		C4M2	12.5	NG/ML		P4NP7S	140.2	NG/ML
100	W	31	170	1.7	87.1	30.1384	PINP	80.5	NG/ML		C1M	41.1	NG/ML		C3M	12.6	NG/ML		Pro-C3	7.7	NG/ML		C4M2	19.3	NG/ML		P4NP7S	220	NG/ML
101	W	23	178	1.78	61	19.2526	PINP	67.3	NG/ML		C1M	36.7	NG/ML		C3M	12.3	NG/ML		Pro-C3	12.8	NG/ML		C4M2	18.3	NG/ML		P4NP7S	246	NG/ML
102	W	84	150	1.5	61.3	27.2444	PINP	75.2	NG/ML		C1M	41.8	NG/ML		C3M	13.6	NG/ML		Pro-C3	8.8	NG/ML		C4M2	25.2	NG/ML		P4NP7S	312	NG/ML
103	M	31	180	1.8	76	23.4568	PINP	99.1	NG/ML		C1M	20.4	NG/ML		C3M	11.8	NG/ML		Pro-C3	8.8	NG/ML		C4M2	16.4	NG/ML		P4NP7S	253.2	NG/ML
104	W	27	176	1.76	66.2	21.3714	PINP	137.7	NG/ML		C1M	26.7	NG/ML		C3M	11.9	NG/ML		Pro-C3	17.2	NG/ML		C4M2	19.1	NG/ML		P4NP7S	251.8	NG/ML
105	W	31	163	1.63	55	20.7008	PINP	65.3	NG/ML		C1M	71.8	NG/ML		C3M	11.5	NG/ML		Pro-C3	9.7	NG/ML		C4M2	18.3	NG/ML		P4NP7S	254.6	NG/ML
106	W	31	154	1.54	46	19.3962	PINP	67.5	NG/ML		C1M	26.4	NG/ML		C3M	9.8	NG/ML		Pro-C3	12.3	NG/ML		C4M2	15.6	NG/ML		P4NP7S	231.5	NG/ML
107	M	27	183	1.83	75.3	22.485	PINP	82.8	NG/ML		C1M	23	NG/ML		C3M	8.5	NG/ML		Pro-C3	8.3	NG/ML		C4M2	14.2	NG/ML		P4NP7S	161.8	NG/ML
108	M	86	164	1.64	66.3	24.6505	PINP	72.8	NG/ML		C1M	38.2	NG/ML		C3M	12.9	NG/ML		Pro-C3	10	NG/ML		C4M2	20.1	NG/ML		P4NP7S	252.6	NG/ML
109	M	25	179	1.79	96	29.9616	PINP	96.3	NG/ML		C1M	50.5	NG/ML		C3M	12.6	NG/ML		Pro-C3	7	NG/ML		C4M2	18.4	NG/ML		P4NP7S	257.6	NG/ML
110	M	26	187	1.87	82	23.4493	PINP	112.1	NG/ML		C1M	18.5	NG/ML		C3M	10.5	NG/ML		Pro-C3	6.8	NG/ML		C4M2	19.2	NG/ML		P4NP7S	216.8	NG/ML
111	M	26	186	1.86	78	22.546	PINP	74	NG/ML		C1M	18.7	NG/ML		C3M	7.1	NG/ML		Pro-C3	9.7	NG/ML		C4M2	12.8	NG/ML		P4NP7S	131.5	NG/ML
112	W	25	162	1.62	60.8	23.1672	PINP	45.9	NG/ML		C1M	20.1	NG/ML		C3M	8.7	NG/ML		Pro-C3	5.5	NG/ML		C4M2	14.1	NG/ML		P4NP7S	166.7	NG/ML
113	W	32	168	1.68	61.4	21.7545	PINP	32.1	NG/ML		C1M	19.1	NG/ML		C3M	8.3	NG/ML		Pro-C3	5.8	NG/ML		C4M2	13.7	NG/ML		P4NP7S	160.5	NG/ML
114	W	31	173	1.73	62.2	20.7825	PINP	33.6	NG/ML		C1M	21.1	NG/ML		C3M	8.9	NG/ML		Pro-C3	5.7	NG/ML		C4M2	12.8	NG/ML		P4NP7S	157.5	NG/ML
115	W	26	162	1.62	52	19.8141	PINP	36.6	NG/ML		C1M	43.7	NG/ML		C3M	11	NG/ML		Pro-C3	8.7	NG/ML		C4M2	19.8	NG/ML		P4NP7S	223.7	NG/ML
116	W	23	173	1.73	57	19.0451	PINP	155.5	NG/ML		C1M	37	NG/ML		C3M	11.8	NG/ML		Pro-C3	22.8	NG/ML		C4M2	25.5	NG/ML		P4NP7S	293.8	NG/ML
117	W	28	173	1.73	62	20.7157	PINP	104.5	NG/ML		C1M	21.2	NG/ML		C3M	7.4	NG/ML		Pro-C3	10.1	NG/ML		C4M2	12.9	NG/ML		P4NP7S	121	NG/ML
118	M	26	178	1.78	75.9	23.9553	PINP	77.1	NG/ML		C1M	23.2	NG/ML		C3M	8.8	NG/ML		Pro-C3	8.3	NG/ML		C4M2	18.1	NG/ML		P4NP7S	171.2	NG/ML
119	W	28	167	1.67	61.9	22.1951	PINP	27	NG/ML		C1M	24.2	NG/ML		C3M	10.1	NG/ML		Pro-C3	8.5	NG/ML		C4M2	16.5	NG/ML		P4NP7S	225.6	NG/ML
120	M	27	170	1.7	62.3	21.5571	PINP	80.1	NG/ML		C1M	16.1	NG/ML		C3M	9.2	NG/ML		Pro-C3	8.8	NG/ML		C4M2	14	NG/ML		P4NP7S	164	NG/ML
121	W	31	168	1.68	63.9	22.6403	PINP	21.7	NG/ML		C1M	32.6	NG/ML		C3M	9	NG/ML		Pro-C3	9.4	NG/ML		C4M2	13.5	NG/ML		P4NP7S	208.7	NG/ML
122	M	26	179	1.79	76.1	23.7508	PINP	45.7	NG/ML		C1M	21.8	NG/ML		C3M	12.3	NG/ML		Pro-C3	8.8	NG/ML		C4M2	21.9	NG/ML		P4NP7S	256.9	NG/ML
123	W	26	165	1.65	55.2	20.2755	PINP	33.8	NG/ML		C1M	74.4	NG/ML		C3M	11.5	NG/ML		Pro-C3	5.5	NG/ML		C4M2	19.6	NG/ML		P4NP7S	210.9	NG/ML
124	W	25	173	1.73	61.6	20.582	PINP	34.9	NG/ML		C1M	25.2	NG/ML		C3M	12	NG/ML		Pro-C3	9.3	NG/ML		C4M2	17.5	NG/ML		P4NP7S	224.2	NG/ML
125	M	28	173	1.73	75.8	25.3266	PINP	67.3	NG/ML		C1M	40.8	NG/ML		C3M	14.2	NG/ML		Pro-C3	6.6	NG/ML		C4M2	27.6	NG/ML		P4NP7S	327.9	NG/ML
126	M	30	189	1.89	69.6	19.4843	PINP	118.1	NG/ML		C1M	21.6	NG/ML		C3M	7.9	NG/ML		Pro-C3	7.5	NG/ML		C4M2	12.9	NG/ML		P4NP7S	154.6	NG/ML
127	W	24	173	1.73	76.8	25.6607	PINP	27.4	NG/ML		C1M	29.5	NG/ML		C3M	10.1	NG/ML		Pro-C3	6.6	NG/ML		C4M2	18.7	NG/ML		P4NP7S	202.9	NG/ML
128	W	30	168	1.68	70	24.8016	PINP	38.2	NG/ML		C1M	16.6	NG/ML		C3M	12.6	NG/ML		Pro-C3	9.1	NG/ML		C4M2	25	NG/ML		P4NP7S	273.1	NG/ML
129	M	23	185	1.85	68	19.8685	PINP	109.5	NG/ML		C1M	20.5	NG/ML		C3M	8.4	NG/ML		Pro-C3	8.4	NG/ML		C4M2	15.9	NG/ML		P4NP7S	162.8	NG/ML
130	M	22	185	1.85	128	37.3996	PINP	155.7	NG/ML		C1M	20.6	NG/ML		C3M	10.2	NG/ML		Pro-C3	8.9	NG/ML		C4M2	16.8	NG/ML		P4NP7S	189.1	NG/ML
131	M	29	181	1.81	68	20.7564	PINP	76.8	NG/ML		C1M	24	NG/ML		C3M	12.2	NG/ML		Pro-C3	6	NG/ML		C4M2	21.5	NG/ML		P4NP7S	243	NG/ML
132	W	30	168	1.68	90	31.8878	PINP	65.2	NG/ML		C1M	25	NG/ML		C3M	10.3	NG/ML		Pro-C3	13.1	NG/ML		C4M2	18.8	NG/ML		P4NP7S	237.9	NG/ML
133	W	77	168	1.68	81.2	28.7698	PINP	47.6	NG/ML		C1M	29.4	NG/ML		C3M	7.9	NG/ML		Pro-C3	5.5	NG/ML		C4M2	16.6	NG/ML		P4NP7S	161.7	NG/ML
134	M	30	180	1.8	78	24.0741	PINP	53.2	NG/ML		C1M	19.9	NG/ML		C3M	10.2	NG/ML		Pro-C3	7.8	NG/ML		C4M2	20.1	NG/ML		P4NP7S	230.7	NG/ML
135	M	35	180	1.8	83.3	25.7099	PINP	83.3	NG/ML		C1M	21.4	NG/ML		C3M	8.4	NG/ML		Pro-C3	7.4	NG/ML		C4M2	14.4	NG/ML		P4NP7S	147.7	NG/ML
136	W	82	163	1.63	54	20.3244	PINP	61.8	NG/ML		C1M	24.1	NG/ML		C3M	8.8	NG/ML		Pro-C3	7.4	NG/ML		C4M2	17.7	NG/ML		P4NP7S	155.2	NG/ML
137	W	79	160	1.6	56	21.875	PINP	33	NG/ML		C1M	31.6	NG/ML		C3M	12.2	NG/ML		Pro-C3	7.2	NG/ML		C4M2	23.3	NG/ML		P4NP7S	228.5	NG/ML
138	M	26	180	1.8	69	21.2963	PINP	73.6	NG/ML		C1M	24.4	NG/ML		C3M	12.7	NG/ML		Pro-C3	8	NG/ML		C4M2	22.1	NG/ML		P4NP7S	246.2	NG/ML
139	W	77	168	1.68	108	38.2653	PINP	68.6	NG/ML		C1M	38	NG/ML		C3M	13	NG/ML		Pro-C3	13.1	NG/ML		C4M2	27	NG/ML		P4NP7S	290.7	NG/ML
140	M	27	188	1.88	104	29.4251	PINP	87	NG/ML		C1M	20.6	NG/ML		C3M	11.5	NG/ML		Pro-C3	8.4	NG/ML		C4M2	19.7	NG/ML		P4NP7S	270.9	NG/ML
141	W	78	164	1.64	65	24.1672	PINP	57.8	NG/ML		C1M	17	NG/ML		C3M	9.2	NG/ML		Pro-C3	8.8	NG/ML		C4M2	20.1	NG/ML		P4NP7S	204	NG/ML
142	M	36	175	1.75	73.6	24.0327	PINP	74.5	NG/ML		C1M	18.1	NG/ML		C3M	7.4	NG/ML		Pro-C3	7.2	NG/ML		C4M2	15.9	NG/ML		P4NP7S	146.1	NG/ML
143	M	78	172	1.72	71.4	24.1347	PINP	30.3	NG/ML		C1M	18	NG/ML		C3M	6.4	NG/ML		Pro-C3	7.2	NG/ML		C4M2	14.8	NG/ML		P4NP7S	125.5	NG/ML
144	W	80	177	1.77	63	20.1092	PINP	42.4	NG/ML		C1M	22.7	NG/ML		C3M	9.3	NG/ML		Pro-C3	6.9	NG/ML		C4M2	19.2	NG/ML		P4NP7S	195.9	NG/ML
145	M	37	181	1.81	92.2	28.1432	PINP	27.2	NG/ML		C1M	22.2	NG/ML		C3M	9.2	NG/ML		Pro-C3	7.3	NG/ML		C4M2	22.3	NG/ML		P4NP7S	193.5	NG/ML
146	W	81	157	1.57	57	23.1247	PINP	59.6	NG/ML		C1M	19	NG/ML		C3M	10.5	NG/ML		Pro-C3	6	NG/ML		C4M2	18.7	NG/ML		P4NP7S	191.9	NG/ML
147	W	35	162	1.62	78.3	29.8354	PINP	48.1	NG/ML		C1M	22.9	NG/ML		C3M	10.7	NG/ML		Pro-C3	12.8	NG/ML		C4M2	20	NG/ML		P4NP7S	216.7	NG/ML
148	M	34	178	1.78	87.7	27.6796	PINP	102.2	NG/ML		C1M	32	NG/ML		C3M	9.7	NG/ML		Pro-C3	16.8	NG/ML		C4M2	18.2	NG/ML		P4NP7S	187.8	NG/ML
149	M	34	176	1.76	81	26.1493	PINP	41	NG/ML		C1M	21.6	NG/ML		C3M	8.2	NG/ML		Pro-C3	7.1	NG/ML		C4M2	17.5	NG/ML		P4NP7S	179.4	NG/ML
150	W	35	162	1.62	66	25.1486	PINP	73.7	NG/ML		C1M	33.4	NG/ML		C3M	11.2	NG/ML		Pro-C3	11	NG/ML		C4M2	19.5	NG/ML		P4NP7S	210.6	NG/ML
151	W	36	158	1.58	56	22.4323	PINP	15.2	NG/ML		C1M	22.8	NG/ML		C3M	8.3	NG/ML		Pro-C3	6	NG/ML		C4M2	14.8	NG/ML		P4NP7S	144.1	NG/ML
152	W	80	164	1.64	75	27.8852	PINP	34.5	NG/ML		C1M	23.6	NG/ML		C3M	8.9	NG/ML		Pro-C3	6.8	NG/ML		C4M2	16.5	NG/ML		P4NP7S	160.2	NG/ML
153	W	37	167	1.67	91.2	32.7011	PINP	28	NG/ML		C1M	30.4	NG/ML		C3M	11.8	NG/ML		Pro-C3	10.3	NG/ML		C4M2	20.3	NG/ML		P4NP7S	222.4	NG/ML
154	W	82	164	1.64	68	25.2826	PINP	58.3	NG/ML		C1M	23.4	NG/ML		C3M	8.4	NG/ML		Pro-C3	9.8	NG/ML		C4M2	13.7	NG/ML		P4NP7S	171.3	NG/ML
155	W	32	168	1.68	63.7	22.5694	PINP	67.6	NG/ML		C1M	25.4	NG/ML		C3M	11	NG/ML		Pro-C3	10.1	NG/ML		C4M2	22.4	NG/ML		P4NP7S	236.9	NG/ML
156	M	29	177	1.77	94.1	30.0361	PINP	74	NG/ML		C1M	27.6	NG/ML		C3M	7	NG/ML		Pro-C3	8.3	NG/ML		C4M2	11.5	NG/ML		P4NP7S	127.3	NG/ML
157	W	80	156	1.56	58	23.833	PINP	171	NG/ML		C1M	30.5	NG/ML		C3M	10.3	NG/ML		Pro-C3	12.1	NG/ML		C4M2	14.3	NG/ML		P4NP7S	271.6	NG/ML
158	W	37	174	1.74	80.6	26.6217	PINP	52.2	NG/ML		C1M	30.7	NG/ML		C3M	11.8	NG/ML		Pro-C3	6.9	NG/ML		C4M2	20.7	NG/ML		P4NP7S	224.7	NG/ML
159	M	37	167	1.67	74	26.5338	PINP	102.6	NG/ML		C1M	19	NG/ML		C3M	9.4	NG/ML		Pro-C3	7.2	NG/ML		C4M2	16.8	NG/ML		P4NP7S	173.8	NG/ML
160	M	79	180	1.8	118	36.4198	PINP	36	NG/ML		C1M	30.3	NG/ML		C3M	9.5	NG/ML		Pro-C3	10.4	NG/ML		C4M2	16.2	NG/ML		P4NP7S	165.1	NG/ML
161	W	36	155	1.55	72	29.9688	PINP	12.2	NG/ML		C1M	57.6	NG/ML		C3M	12.8	NG/ML		Pro-C3	5.7	NG/ML		C4M2	19.2	NG/ML		P4NP7S	232.5	NG/ML
162	W	37	169	1.69	87.3	30.5662	PINP	25.3	NG/ML		C1M	21.7	NG/ML		C3M	8.4	NG/ML		Pro-C3	7.7	NG/ML		C4M2	13.4	NG/ML		P4NP7S	172.2	NG/ML
163	M	79	167	1.67	76	27.2509	PINP	58.4	NG/ML		C1M	28.4	NG/ML		C3M	10.5	NG/ML		Pro-C3	17.3	NG/ML		C4M2	20.3	NG/ML		P4NP7S	240.9	NG/ML
164	W	36	159	1.59	78	30.8532	PINP	33.4	NG/ML		C1M	33.6	NG/ML		C3M	8.2	NG/ML		Pro-C3	5.5	NG/ML		C4M2	17.6	NG/ML		P4NP7S	159.2	NG/ML
165	W	35	161	1.61	67.2	25.9249	PINP	32	NG/ML		C1M	22.7	NG/ML		C3M	9.4	NG/ML		Pro-C3	5.4	NG/ML		C4M2	20.7	NG/ML		P4NP7S	179.2	NG/ML
166	M	79	168	1.68	81	28.699	PINP	32.8	NG/ML		C1M	22.5	NG/ML		C3M	9.8	NG/ML		Pro-C3	7.6	NG/ML		C4M2	18.3	NG/ML		P4NP7S	212.9	NG/ML
167	M	36	180	1.8	81.5	25.1543	PINP	47.4	NG/ML		C1M	29.3	NG/ML		C3M	11.9	NG/ML		Pro-C3	9.7	NG/ML		C4M2	22.6	NG/ML		P4NP7S	220.8	NG/ML
168	W	79	170	1.7	83.1	28.7543	PINP	41.5	NG/ML		C1M	33	NG/ML		C3M	16.1	NG/ML		Pro-C3	11.8	NG/ML		C4M2	27.5	NG/ML		P4NP7S	334.3	NG/ML
169	M	36	177	1.77	68	21.7051	PINP	54.7	NG/ML		C1M	66.1	NG/ML		C3M	9.3	NG/ML		Pro-C3	14.8	NG/ML		C4M2	16	NG/ML		P4NP7S	233.6	NG/ML
170	W	36	160	1.6	78.4	30.625	PINP	19.4	NG/ML		C1M	56.1	NG/ML		C3M	8.4	NG/ML		Pro-C3	5	NG/ML		C4M2	15.2	NG/ML		P4NP7S	161	NG/ML
171	M	33	177	1.77	70	22.3435	PINP	40.5	NG/ML		C1M	20.5	NG/ML		C3M	9.9	NG/ML		Pro-C3	7.8	NG/ML		C4M2	19.8	NG/ML		P4NP7S	237.4	NG/ML
172	M	78	169	1.69	73	25.5593	PINP	79.8	NG/ML		C1M	38.1	NG/ML		C3M	10.9	NG/ML		Pro-C3	14.1	NG/ML		C4M2	20.2	NG/ML		P4NP7S	259.9	NG/ML
173	M	80	168	1.68	79	27.9904	PINP	30.3	NG/ML		C1M	27.5	NG/ML		C3M	9.1	NG/ML		Pro-C3	14.3	NG/ML		C4M2	17.8	NG/ML		P4NP7S	199.3	NG/ML
174	W	33	164	1.64	65	24.1672	PINP	40.2	NG/ML		C1M	30.3	NG/ML		C3M	9.6	NG/ML		Pro-C3	5.2	NG/ML		C4M2	17.5	NG/ML		P4NP7S	179.8	NG/ML
175	M	78	171	1.71	71.2	24.3494	PINP	107.4	NG/ML		C1M	30.6	NG/ML		C3M	7.9	NG/ML		Pro-C3	10.1	NG/ML		C4M2	15.1	NG/ML		P4NP7S	125.5	NG/ML
176	M	36	182	1.82	83	25.0574	PINP	25	NG/ML		C1M	17.6	NG/ML		C3M	8.3	NG/ML		Pro-C3	6.5	NG/ML		C4M2	11.4	NG/ML		P4NP7S	131.2	NG/ML
177	W	80	160	1.6	54.3	21.2109	PINP	40.1	NG/ML		C1M	24.4	NG/ML		C3M	9.7	NG/ML		Pro-C3	7.4	NG/ML		C4M2	19.3	NG/ML		P4NP7S	232.8	NG/ML
178	W	79	161	1.61	67.7	26.1178	PINP	42.5	NG/ML		C1M	37.4	NG/ML		C3M	9.1	NG/ML		Pro-C3	6.7	NG/ML		C4M2	23.1	NG/ML		P4NP7S	207.9	NG/ML
179	M	78	166	1.66	86.1	31.2455	PINP	25.3	NG/ML		C1M	60.4	NG/ML		C3M	8.4	NG/ML		Pro-C3	7	NG/ML		C4M2	18.5	NG/ML		P4NP7S	197.3	NG/ML
180	W	79	157	1.57	65.4	26.5325	PINP	77	NG/ML		C1M	44.9	NG/ML		C3M	9	NG/ML		Pro-C3	7.8	NG/ML		C4M2	23.6	NG/ML		P4NP7S	227.7	NG/ML
181	W	35	165	1.65	51.3	18.843	PINP	42.2	NG/ML		C1M	13.5	NG/ML		C3M	9.8	NG/ML		Pro-C3	5.9	NG/ML		C4M2	19.1	NG/ML		P4NP7S	200.8	NG/ML
182	W	77	151	1.51	57.5	25.2182	PINP	62.3	NG/ML		C1M	24	NG/ML		C3M	8.8	NG/ML		Pro-C3	7.8	NG/ML		C4M2	19.2	NG/ML		P4NP7S	177.4	NG/ML
183	W	35	184	1.84	64.2	18.9627	PINP	32	NG/ML		C1M	23.9	NG/ML		C3M	8.7	NG/ML		Pro-C3	6.2	NG/ML		C4M2	16	NG/ML		P4NP7S	212.4	NG/ML
184	M	77	159	1.59	60.3	23.8519	PINP	28.6	NG/ML		C1M	23.8	NG/ML		C3M	9.4	NG/ML		Pro-C3	7.6	NG/ML		C4M2	16.9	NG/ML		P4NP7S	182.9	NG/ML
185	W	80	164	1.64	54.1	20.1145	PINP	100.6	NG/ML		C1M	13.2	NG/ML	BELOW LOWER LIMIT OF QUANTIFICATION	C3M	6.9	NG/ML		Pro-C3	11.4	NG/ML		C4M2	14.2	NG/ML		P4NP7S	138.1	NG/ML
186	W	33	184	1.84	65.8	19.4353	PINP	46.6	NG/ML		C1M	18.9	NG/ML		C3M	9.5	NG/ML		Pro-C3	8.3	NG/ML		C4M2	18.6	NG/ML		P4NP7S	201.1	NG/ML
187	M	79	168	1.68	75.9	26.892	PINP	78.7	NG/ML		C1M	18.2	NG/ML		C3M	8.8	NG/ML		Pro-C3	14.4	NG/ML		C4M2	17.4	NG/ML		P4NP7S	235.2	NG/ML
188	M	34	185	1.85	64	18.6998	PINP	69.9	NG/ML		C1M	15.3	NG/ML		C3M	9.1	NG/ML		Pro-C3	8	NG/ML		C4M2	19.6	NG/ML		P4NP7S	231.5	NG/ML
189	W	34	164	1.64	80.8	30.0416	PINP	21.4	NG/ML		C1M	39.5	NG/ML		C3M	9.6	NG/ML		Pro-C3	6.1	NG/ML		C4M2	21.8	NG/ML		P4NP7S	226.5	NG/ML
190	W	81	158	1.58	79.1	31.6856	PINP	34.1	NG/ML		C1M	27.5	NG/ML		C3M	9.1	NG/ML		Pro-C3	11.4	NG/ML		C4M2	16.2	NG/ML		P4NP7S	200.7	NG/ML
191	M	78	169	1.69	90.2	31.5815	PINP	89.3	NG/ML		C1M	22	NG/ML		C3M	9.7	NG/ML		Pro-C3	11.2	NG/ML		C4M2	22.9	NG/ML		P4NP7S	223.1	NG/ML
192	W	36	162	1.62	52	19.8141	PINP	45.5	NG/ML		C1M	36.1	NG/ML		C3M	9.3	NG/ML		Pro-C3	6.4	NG/ML		C4M2	15.8	NG/ML		P4NP7S	193.7	NG/ML
193	W	80	154	1.54	54.5	22.9803	PINP	44.7	NG/ML		C1M	14.4	NG/ML		C3M	9.9	NG/ML		Pro-C3	10.9	NG/ML		C4M2	17.9	NG/ML		P4NP7S	224.7	NG/ML
194	M	79	183	1.83	86.6	25.8592	PINP	55.5	NG/ML		C1M	19.3	NG/ML		C3M	9.3	NG/ML		Pro-C3	9.4	NG/ML		C4M2	16.3	NG/ML		P4NP7S	211.4	NG/ML
195	M	37	187	1.87	98.9	28.2822	PINP	89.4	NG/ML		C1M	14.6	NG/ML		C3M	7.4	NG/ML		Pro-C3	13.2	NG/ML		C4M2	14.1	NG/ML		P4NP7S	157.1	NG/ML
196	W	33	181	1.81	70	21.3669	PINP	44.4	NG/ML		C1M	15.7	NG/ML		C3M	7.6	NG/ML		Pro-C3	9	NG/ML		C4M2	12.2	NG/ML		P4NP7S	144.7	NG/ML
197	W	30	168	1.68	79.5	28.1675	PINP	58.1	NG/ML		C1M	25.5	NG/ML		C3M	10.2	NG/ML		Pro-C3	10	NG/ML		C4M2	19.1	NG/ML		P4NP7S	202.5	NG/ML
198	W	25	172	1.72	62	20.9573	PINP	110.9	NG/ML		C1M	21.2	NG/ML		C3M	12.6	NG/ML		Pro-C3	11.8	NG/ML		C4M2	21.8	NG/ML		P4NP7S	244.2	NG/ML
199	W	35	166	1.66	84.5	30.6648	PINP	28.6	NG/ML		C1M	27.8	NG/ML		C3M	10.1	NG/ML		Pro-C3	9.1	NG/ML		C4M2	21.2	NG/ML		P4NP7S	248.1	NG/ML
200	W	81	155	1.55	70	29.1363	PINP	72.6	NG/ML		C1M	21.5	NG/ML		C3M	9.9	NG/ML		Pro-C3	9.4	NG/ML		C4M2	15.1	NG/ML		P4NP7S	197.8	NG/ML
201	W	82	175	1.75	74.2	24.2286	PINP	93.6	NG/ML		C1M	32.6	NG/ML		C3M	8.3	NG/ML		Pro-C3	9.7	NG/ML		C4M2	16.6	NG/ML		P4NP7S	193.4	NG/ML
202	W	82	152	1.52	69.3	29.9948	PINP	64.7	NG/ML		C1M	20.6	NG/ML		C3M	7.1	NG/ML		Pro-C3	9.1	NG/ML		C4M2	12.8	NG/ML		P4NP7S	139.1	NG/ML
203	W	37	162	1.62	59.3	22.5956	PINP	42.4	NG/ML		C1M	30.3	NG/ML		C3M	12.3	NG/ML		Pro-C3	8.3	NG/ML		C4M2	28.6	NG/ML		P4NP7S	281.3	NG/ML
204	W	79	160	1.6	78.6	30.7031	PINP	106.8	NG/ML		C1M	26.3	NG/ML		C3M	10.7	NG/ML		Pro-C3	8.7	NG/ML		C4M2	19.7	NG/ML		P4NP7S	219.1	NG/ML
205	W	78	153	1.53	59	25.204	PINP	129.5	NG/ML		C1M	17.7	NG/ML		C3M	10.4	NG/ML		Pro-C3	13.4	NG/ML		C4M2	18.8	NG/ML		P4NP7S	221.3	NG/ML
206	M	79	170	1.7	77	26.6436	PINP	21.5	NG/ML		C1M	13.2	NG/ML	BELOW LOWER LIMIT OF QUANTIFICATION	C3M	7.4	NG/ML		Pro-C3	8.9	NG/ML		C4M2	11.7	NG/ML		P4NP7S	167.8	NG/ML
207	W	34	155	1.55	49.7	20.6868	PINP	50	NG/ML		C1M	17.9	NG/ML		C3M	8.2	NG/ML		Pro-C3	6.8	NG/ML		C4M2	14.8	NG/ML		P4NP7S	169.9	NG/ML
208	W	78	154	1.54	80.4	33.9012	PINP	57.4	NG/ML		C1M	22	NG/ML		C3M	8.1	NG/ML		Pro-C3	7.6	NG/ML		C4M2	14.9	NG/ML		P4NP7S	160	NG/ML
209	M	80	167	1.67	56	20.0796	PINP	35.9	NG/ML		C1M	25	NG/ML		C3M	11	NG/ML		Pro-C3	6.5	NG/ML		C4M2	15.7	NG/ML		P4NP7S	170.6	NG/ML
210	M	78	170	1.7	93.7	32.4221	PINP	50.7	NG/ML		C1M	46.7	NG/ML		C3M	7.5	NG/ML		Pro-C3	10	NG/ML		C4M2	12.9	NG/ML		P4NP7S	173.6	NG/ML
211	W	78	169	1.69	72	25.2092	PINP	57	NG/ML		C1M	16.7	NG/ML		C3M	8.1	NG/ML		Pro-C3	8	NG/ML		C4M2	11.7	NG/ML		P4NP7S	135.1	NG/ML
212	W	37	162	1.62	77.4	29.4925	PINP	54.8	NG/ML		C1M	23	NG/ML		C3M	10.2	NG/ML		Pro-C3	8.2	NG/ML		C4M2	15.4	NG/ML		P4NP7S	187.6	NG/ML
213	W	80	151	1.51	68.3	29.9548	PINP	96.9	NG/ML		C1M	20	NG/ML		C3M	11.7	NG/ML		Pro-C3	12.1	NG/ML		C4M2	18.5	NG/ML		P4NP7S	213.1	NG/ML
214	M	34	174	1.74	81	26.7539	PINP	71.7	NG/ML		C1M	23.1	NG/ML		C3M	11.9	NG/ML		Pro-C3	6.7	NG/ML		C4M2	23.5	NG/ML		P4NP7S	309.8	NG/ML
215	W	34	154	1.54	51.8	21.8418	PINP	51.4	NG/ML		C1M	19.8	NG/ML		C3M	8.9	NG/ML		Pro-C3	9	NG/ML		C4M2	17	NG/ML		P4NP7S	181.2	NG/ML
216	M	80	163	1.63	62.8	23.6366	PINP	41.2	NG/ML		C1M	19.8	NG/ML		C3M	7.9	NG/ML		Pro-C3	5.2	NG/ML		C4M2	13.5	NG/ML		P4NP7S	169	NG/ML
217	M	79	181	1.81	88.5	27.0138	PINP	57	NG/ML		C1M	15.9	NG/ML		C3M	9.2	NG/ML		Pro-C3		NG/ML		C4M2	20.1	NG/ML		P4NP7S	238.4	NG/ML
218	W	78	163	1.63	78	29.3575	PINP	124.2	NG/ML		C1M	13.5	NG/ML		C3M	7	NG/ML		Pro-C3	9	NG/ML		C4M2	13.9	NG/ML		P4NP7S	152.1	NG/ML
219	W	33	164	1.64	67.3	25.0223	PINP	107.3	NG/ML		C1M	16.4	NG/ML		C3M	8.7	NG/ML		Pro-C3	9.5	NG/ML		C4M2	15	NG/ML		P4NP7S	156.3	NG/ML
220	W	33	174	1.74	65.8	21.7334	PINP	56.5	NG/ML		C1M	16.1	NG/ML		C3M	12.5	NG/ML		Pro-C3	8.7	NG/ML		C4M2	17.2	NG/ML		P4NP7S	196.2	NG/ML
221	M	36	177	1.77	81	25.8546	PINP	73.8	NG/ML		C1M	24.8	NG/ML		C3M	9.4	NG/ML		Pro-C3	8.4	NG/ML		C4M2	15.7	NG/ML		P4NP7S	169.5	NG/ML
222	M	36	175	1.75	84	27.4286	PINP	97.3	NG/ML		C1M	25.7	NG/ML		C3M	12.5	NG/ML		Pro-C3	10.9	NG/ML		C4M2	22.4	NG/ML		P4NP7S	223.6	NG/ML
223	M	35	193	1.93	106.5	28.5914	PINP	46.5	NG/ML		C1M	26	NG/ML		C3M	11.7	NG/ML		Pro-C3	13.7	NG/ML		C4M2	21.2	NG/ML		P4NP7S	213.3	NG/ML
224	W	35	170	1.7	93	32.1799	PINP	64.1	NG/ML		C1M	33.8	NG/ML		C3M	13.4	NG/ML		Pro-C3	8.8	NG/ML		C4M2	21.2	NG/ML		P4NP7S	285.6	NG/ML
225	W	79	153	1.53	58	24.7768	PINP	74.2	NG/ML		C1M	25.2	NG/ML		C3M	10.9	NG/ML		Pro-C3	8.3	NG/ML		C4M2	19.5	NG/ML		P4NP7S	164.2	NG/ML
226	W	36	164	1.64	64	23.7954	PINP	20.2	NG/ML		C1M	19.1	NG/ML		C3M	9.5	NG/ML		Pro-C3	5.6	NG/ML		C4M2	15.2	NG/ML		P4NP7S	164.3	NG/ML
227	W	37	163	1.63	90.4	34.0246	PINP	37	NG/ML		C1M	51.2	NG/ML		C3M	13.4	NG/ML		Pro-C3	10.3	NG/ML		C4M2	24.7	NG/ML		P4NP7S	262.2	NG/ML
228	W	37	167	1.67	64	22.9481	PINP	13.8	NG/ML		C1M	18.1	NG/ML		C3M	8.2	NG/ML		Pro-C3	5.2	NG/ML		C4M2	10.3	NG/ML		P4NP7S	135.3	NG/ML
229	M	36	177	1.77	64.2	20.4922	PINP	49.6	NG/ML		C1M	24.4	NG/ML		C3M	9.3	NG/ML		Pro-C3	8.4	NG/ML		C4M2	16.4	NG/ML		P4NP7S	195.9	NG/ML
230	W	37	185	1.85	69.5	20.3068	PINP	16.6	NG/ML		C1M	38.9	NG/ML		C3M	11.2	NG/ML		Pro-C3	8	NG/ML		C4M2	15.7	NG/ML		P4NP7S	194.2	NG/ML
231	M	78	172	1.72	82.2	27.7853	PINP	26.2	NG/ML		C1M	22.1	NG/ML		C3M	9.7	NG/ML		Pro-C3	8.4	NG/ML		C4M2	15	NG/ML		P4NP7S	153	NG/ML
232	M	23	187	1.87	77	22.0195	PINP	93	NG/ML		C1M	27.4	NG/ML		C3M	10.7	NG/ML		Pro-C3	7.3	NG/ML		C4M2	16	NG/ML		P4NP7S	174.5	NG/ML
233	M	79	167	1.67	67	24.0238	PINP	35.1	NG/ML		C1M	14.5	NG/ML		C3M	9	NG/ML		Pro-C3	9.6	NG/ML		C4M2	12.1	NG/ML		P4NP7S	127.1	NG/ML
234	W	80	164	1.64	72	26.7698	PINP	41.6	NG/ML		C1M	47.4	NG/ML		C3M	8.3	NG/ML		Pro-C3	10.6	NG/ML		C4M2	9.3	NG/ML		P4NP7S	111.1	NG/ML
235	M	35	183	1.83	63.5	18.9615	PINP	41.8	NG/ML		C1M	21	NG/ML		C3M	9.8	NG/ML		Pro-C3	4.5	NG/ML		C4M2	14.4	NG/ML		P4NP7S	166.2	NG/ML
236	M	31	171	1.71	78	26.6749	PINP	97.5	NG/ML		C1M	28.8	NG/ML		C3M	13.2	NG/ML		Pro-C3	10.2	NG/ML		C4M2	21.4	NG/ML		P4NP7S	236.5	NG/ML
237	M	37	177	1.77	82.2	26.2377	PINP	109.6	NG/ML		C1M	26.8	NG/ML		C3M	9.4	NG/ML		Pro-C3	5.5	NG/ML		C4M2	14.1	NG/ML		P4NP7S	172.4	NG/ML
238	M	34	175	1.75	76	24.8163	PINP	58.8	NG/ML		C1M	19.5	NG/ML		C3M	8.6	NG/ML		Pro-C3	5.7	NG/ML		C4M2	12.4	NG/ML		P4NP7S	129.8	NG/ML
239	W	34	156	1.56	55	22.6003	PINP	64.8	NG/ML		C1M	27.4	NG/ML		C3M	11.4	NG/ML		Pro-C3	9.9	NG/ML		C4M2	23.5	NG/ML		P4NP7S	249.8	NG/ML
240	M	33	182	1.82	88	26.5668	PINP	95.4	NG/ML		C1M	28.7	NG/ML		C3M	7.3	NG/ML		Pro-C3	6.3	NG/ML		C4M2	16.4	NG/ML		P4NP7S	132.1	NG/ML
241	W	35	178	1.78	75.5	23.8291	PINP	35.8	NG/ML		C1M	29.4	NG/ML		C3M	14.8	NG/ML		Pro-C3	11.1	NG/ML		C4M2	25.2	NG/ML		P4NP7S	315.4	NG/ML
242	M	36	182	1.82	67	20.227	PINP	61.7	NG/ML		C1M	26.9	NG/ML		C3M	11.6	NG/ML		Pro-C3	6.3	NG/ML		C4M2	24.5	NG/ML		P4NP7S	257.6	NG/ML
243	M	74	177	1.77	95.3	30.4191	PINP	18.9	NG/ML		C1M	19.8	NG/ML		C3M	10.7	NG/ML		Pro-C3	6.9	NG/ML		C4M2	23.7	NG/ML		P4NP7S	208.6	NG/ML
244	M	73	178	1.78	71	22.4088	PINP	63.1	NG/ML		C1M	26.6	NG/ML		C3M	9.8	NG/ML		Pro-C3	9.3	NG/ML		C4M2	19.6	NG/ML		P4NP7S	193.3	NG/ML
245	W	72	160	1.6	70.8	27.6562	PINP	42.1	NG/ML		C1M	26	NG/ML		C3M	9.1	NG/ML		Pro-C3	7.4	NG/ML		C4M2	17.9	NG/ML		P4NP7S	204.6	NG/ML
246	W	70	154	1.54	53.1	22.3899	PINP	47.4	NG/ML		C1M	25.3	NG/ML		C3M	8.7	NG/ML		Pro-C3	4	NG/ML		C4M2	15	NG/ML		P4NP7S	157.7	NG/ML
247	M	72	180	1.8	81	25	PINP	42.6	NG/ML		C1M	43.2	NG/ML		C3M	10.5	NG/ML		Pro-C3	8.6	NG/ML		C4M2	19.4	NG/ML		P4NP7S	187.2	NG/ML
248	M	72	164	1.64	70.2	26.1005	PINP	19.2	NG/ML		C1M	24.9	NG/ML		C3M	9.1	NG/ML		Pro-C3	5.8	NG/ML		C4M2	15.5	NG/ML		P4NP7S	160	NG/ML
249	M	71	181	1.81	77.5	23.6562	PINP	31.8	NG/ML		C1M	50.6	NG/ML		C3M	14.4	NG/ML		Pro-C3	10.7	NG/ML		C4M2	27.7	NG/ML		P4NP7S	316.5	NG/ML
250	W	71	162	1.62	69.3	26.406	PINP	55.2	NG/ML		C1M	29.3	NG/ML		C3M	6.5	NG/ML		Pro-C3	4.7	NG/ML		C4M2	10.9	NG/ML		P4NP7S	98.6	NG/ML
251	W	72	158	1.58	63.7	25.5167	PINP	14.8	NG/ML		C1M	41.8	NG/ML		C3M	9.5	NG/ML		Pro-C3	7.1	NG/ML		C4M2	16.8	NG/ML		P4NP7S	198.5	NG/ML
252	M	72	163	1.63	75	28.2284	PINP	13.5	NG/ML		C1M	28.7	NG/ML		C3M	9.8	NG/ML		Pro-C3	8.4	NG/ML		C4M2	15.9	NG/ML		P4NP7S	186.3	NG/ML
253	W	73	158	1.58	55	22.0317	PINP	83.2	NG/ML		C1M	28.8	NG/ML		C3M	10.4	NG/ML		Pro-C3	6.4	NG/ML		C4M2	19.3	NG/ML		P4NP7S	212.9	NG/ML
254	M	71	175	1.75	89	29.0612	PINP	83	NG/ML		C1M	51.6	NG/ML		C3M	11.9	NG/ML		Pro-C3	17.9	NG/ML		C4M2	19.3	NG/ML		P4NP7S	271.3	NG/ML
255	M	70	170	1.7	97	33.564	PINP	26.1	NG/ML		C1M	25.8	NG/ML		C3M	7.8	NG/ML		Pro-C3	8	NG/ML		C4M2	13.4	NG/ML		P4NP7S	135.6	NG/ML
256	W	71	155	1.55	58.4	24.308	PINP	55.7	NG/ML		C1M	22.3	NG/ML		C3M	7.1	NG/ML		Pro-C3	5.1	NG/ML		C4M2	12.7	NG/ML		P4NP7S	116.2	NG/ML
257	M	71	176	1.76	85	27.4406	PINP	35.6	NG/ML		C1M	23.5	NG/ML		C3M	6.7	NG/ML		Pro-C3	8.8	NG/ML		C4M2	12.4	NG/ML		P4NP7S	115.4	NG/ML
258	M	72	175	1.75	97	31.6735	PINP	45	NG/ML		C1M	74.2	NG/ML		C3M	12.6	NG/ML		Pro-C3	8.2	NG/ML		C4M2	23.4	NG/ML		P4NP7S	258.2	NG/ML
259	W	72	158	1.58	74.1	29.6827	PINP	84.7	NG/ML		C1M	30.7	NG/ML		C3M	14.8	NG/ML		Pro-C3	9.7	NG/ML		C4M2	24.2	NG/ML		P4NP7S	266.5	NG/ML
260	M	71	158	1.58	77.8	31.1649	PINP	39.7	NG/ML		C1M	39.6	NG/ML		C3M	9.5	NG/ML		Pro-C3	8.5	NG/ML		C4M2	15.8	NG/ML		P4NP7S	176.2	NG/ML
261	W	74	167	1.67	77.9	27.9322	PINP	82.2	NG/ML		C1M	50	NG/ML		C3M	7.1	NG/ML		Pro-C3	9.8	NG/ML		C4M2	14.3	NG/ML		P4NP7S	130.8	NG/ML
262	W	71	158	1.58	53.9	21.5911	PINP	79.5	NG/ML		C1M	25.8	NG/ML		C3M	10	NG/ML		Pro-C3	7.1	NG/ML		C4M2	19.6	NG/ML		P4NP7S	207.8	NG/ML
263	M	70	184	1.84	85.9	25.3722	PINP	27.1	NG/ML		C1M	73.2	NG/ML		C3M	10.7	NG/ML		Pro-C3	6.5	NG/ML		C4M2	22.5	NG/ML		P4NP7S	240.4	NG/ML
264	W	74	166	1.66	66.7	24.2053	PINP	79	NG/ML		C1M	24.3	NG/ML		C3M	10.2	NG/ML		Pro-C3	10.5	NG/ML		C4M2	17.1	NG/ML		P4NP7S	168.3	NG/ML
265	W	73	146	1.46	61.8	28.9923	PINP	50.3	NG/ML		C1M	38.5	NG/ML		C3M	10.9	NG/ML		Pro-C3	6.6	NG/ML		C4M2	21.3	NG/ML		P4NP7S	202.2	NG/ML
266	W	71	164	1.64	78.6	29.2237	PINP	15.7	NG/ML		C1M	52.7	NG/ML		C3M	22.7	NG/ML		Pro-C3	8.3	NG/ML		C4M2	34	NG/ML		P4NP7S	494.8	NG/ML
267	W	74	165	1.65	76.5	28.0992	PINP	13.8	NG/ML		C1M		NG/ML		C3M	14.4	NG/ML		Pro-C3	7.3	NG/ML		C4M2	30.2	NG/ML		P4NP7S	332.2	NG/ML
268	W	73	163	1.63	78	29.3575	PINP	78.6	NG/ML		C1M	35.6	NG/ML		C3M	9.8	NG/ML		Pro-C3	20.4	NG/ML		C4M2	16.4	NG/ML		P4NP7S	166.6	NG/ML
269	W	70	175	1.75	68.5	22.3673	PINP	30.6	NG/ML		C1M	32.8	NG/ML		C3M	10	NG/ML		Pro-C3	6.5	NG/ML		C4M2	18	NG/ML		P4NP7S	196.9	NG/ML
270	W	70	165	1.65	61.3	22.5161	PINP	18.6	NG/ML		C1M	44.3	NG/ML		C3M	12.1	NG/ML		Pro-C3	4.3	NG/ML		C4M2	23.5	NG/ML		P4NP7S	240.1	NG/ML
271	W	24	161	1.61	48.1	18.5564	PINP	44.9	NG/ML		C1M	15	NG/ML		C3M	6.9	NG/ML		Pro-C3	7.6	NG/ML		C4M2	10.8	NG/ML		P4NP7S	89.7	NG/ML
272	W	73	157	1.57	78.1	31.6849	PINP	27.4	NG/ML		C1M	39.4	NG/ML		C3M	11.7	NG/ML		Pro-C3	14.9	NG/ML		C4M2	23.6	NG/ML		P4NP7S	209.1	NG/ML
273	M	74	165	1.65	79.4	29.1644	PINP	26	NG/ML		C1M	22.8	NG/ML		C3M	7.3	NG/ML		Pro-C3	8.6	NG/ML		C4M2	14	NG/ML		P4NP7S	115.2	NG/ML
274	W	72	163	1.63	65.9	24.8033	PINP	39.2	NG/ML		C1M	32.4	NG/ML		C3M	10.7	NG/ML		Pro-C3	7.9	NG/ML		C4M2	21.1	NG/ML		P4NP7S	177.9	NG/ML
275	M	73	177	1.77	100.3	32.0151	PINP	25.6	NG/ML		C1M	29.8	NG/ML		C3M	10.1	NG/ML		Pro-C3	12.7	NG/ML		C4M2	17.4	NG/ML		P4NP7S	155.7	NG/ML
276	M	71	176	1.76	87.6	28.28	PINP	54.7	NG/ML		C1M	21.7	NG/ML		C3M	10.6	NG/ML		Pro-C3	13.5	NG/ML		C4M2	21.4	NG/ML		P4NP7S	222.3	NG/ML
277	M	35	188	1.88	78.6	22.2386	PINP	75.5	NG/ML		C1M	29.5	NG/ML		C3M	10.6	NG/ML		Pro-C3	11.9	NG/ML		C4M2	21.2	NG/ML		P4NP7S	223.7	NG/ML
278	M	73	184	1.84	101.6	30.0095	PINP	33.6	NG/ML		C1M	32.3	NG/ML		C3M	9.2	NG/ML		Pro-C3	7.5	NG/ML		C4M2	21	NG/ML		P4NP7S	212.2	NG/ML
279	M	74	173	1.73	66.5	22.2193	PINP	38.9	NG/ML		C1M	26.3	NG/ML		C3M	8.6	NG/ML		Pro-C3	10	NG/ML		C4M2	16.6	NG/ML		P4NP7S	170.4	NG/ML
280	W	67	163	1.63	53.1	19.9857	PINP	61.3	NG/ML		C1M	71.8	NG/ML		C3M	12.7	NG/ML		Pro-C3	5.8	NG/ML		C4M2	26.8	NG/ML		P4NP7S	311.2	NG/ML
281	M	65	178	1.78	86	27.143	PINP	32.3	NG/ML		C1M	26.1	NG/ML		C3M	7	NG/ML		Pro-C3	8.3	NG/ML		C4M2	14.2	NG/ML		P4NP7S	129.8	NG/ML
282	M	68	161	1.61	74	28.5483	PINP	73.8	NG/ML		C1M	13.2	NG/ML	BELOW LOWER LIMIT OF QUANTIFICATION	C3M	9	NG/ML		Pro-C3	10.2	NG/ML		C4M2	18.1	NG/ML		P4NP7S	155.5	NG/ML
283	M	69	167	1.67	84	30.1194	PINP	30.7	NG/ML		C1M	25.4	NG/ML		C3M	7	NG/ML		Pro-C3	7.1	NG/ML		C4M2	14.3	NG/ML		P4NP7S	111	NG/ML
284	W	66	170	1.7	97	33.564	PINP	43.9	NG/ML		C1M	19	NG/ML		C3M	13.1	NG/ML		Pro-C3	6.5	NG/ML		C4M2	23.5	NG/ML		P4NP7S	196.9	NG/ML
285	W	67	160	1.6	60	23.4375	PINP	44	NG/ML		C1M	36.1	NG/ML		C3M	10.6	NG/ML		Pro-C3	6.5	NG/ML		C4M2	23.6	NG/ML		P4NP7S	210.4	NG/ML
286	M	66	180	1.8	80	24.6914	PINP	43	NG/ML		C1M	34.3	NG/ML		C3M	11.2	NG/ML		Pro-C3	8.8	NG/ML		C4M2	22.6	NG/ML		P4NP7S	241.4	NG/ML
287	W	68	158	1.58	79	31.6456	PINP	126.6	NG/ML		C1M	27.5	NG/ML		C3M	12.9	NG/ML		Pro-C3	7.6	NG/ML		C4M2	23.2	NG/ML		P4NP7S	267.8	NG/ML
288	W	65	155	1.55	61.2	25.4735	PINP	49.5	NG/ML		C1M	26.1	NG/ML		C3M	10	NG/ML		Pro-C3	6.8	NG/ML		C4M2	19.2	NG/ML		P4NP7S	171.4	NG/ML
289	W	73	155	1.55	76	31.6337	PINP	37.6	NG/ML		C1M	35.5	NG/ML		C3M	9.2	NG/ML		Pro-C3	6.6	NG/ML		C4M2	18.2	NG/ML		P4NP7S	185.7	NG/ML
290	M	67	172	1.72	82	27.7177	PINP	29.9	NG/ML		C1M	27.5	NG/ML		C3M	10.7	NG/ML		Pro-C3	6.3	NG/ML		C4M2	18.7	NG/ML		P4NP7S	229.3	NG/ML
291	M	35	188	1.88	86	24.3323	PINP	44.7	NG/ML		C1M	20.2	NG/ML		C3M	8.3	NG/ML		Pro-C3	5.5	NG/ML		C4M2	14.7	NG/ML		P4NP7S	149.2	NG/ML
292	W	66	163	1.63	65.6	24.6904	PINP	78.3	NG/ML		C1M	26	NG/ML		C3M	7.5	NG/ML		Pro-C3	7.4	NG/ML		C4M2	16.6	NG/ML		P4NP7S	137.5	NG/ML
293	W	67	168	1.68	75.3	26.6794	PINP	82.8	NG/ML		C1M	26	NG/ML		C3M	8.4	NG/ML		Pro-C3	11.8	NG/ML		C4M2	18	NG/ML		P4NP7S	169.8	NG/ML
294	M	66	169	1.69	85.5	29.9359	PINP	47	NG/ML		C1M	34.3	NG/ML		C3M	7.6	NG/ML		Pro-C3	11	NG/ML		C4M2	15.1	NG/ML		P4NP7S	165.4	NG/ML
295	M	69	171	1.71	69.3	23.6996	PINP	32.5	NG/ML		C1M	36.8	NG/ML		C3M	9.8	NG/ML		Pro-C3	4.1	NG/ML		C4M2	21.8	NG/ML		P4NP7S	228.2	NG/ML
296	M	71	170	1.7	87.5	30.2768	PINP	49	NG/ML		C1M	16.1	NG/ML		C3M	8.4	NG/ML		Pro-C3	7.2	NG/ML		C4M2	19.8	NG/ML		P4NP7S	152.9	NG/ML
297	M	67	169	1.69	85.4	29.9009	PINP	23.2	NG/ML		C1M	18.8	NG/ML		C3M	8.9	NG/ML		Pro-C3	6	NG/ML		C4M2	17.3	NG/ML		P4NP7S	173.6	NG/ML
298	W	66	152	1.52	54.8	23.7188	PINP	44.4	NG/ML		C1M	25.1	NG/ML		C3M	9.9	NG/ML		Pro-C3	5.4	NG/ML		C4M2	21	NG/ML		P4NP7S	219.5	NG/ML
299	W	67	167	1.67	82.6	29.6174	PINP	38	NG/ML		C1M	22.9	NG/ML		C3M	10.5	NG/ML		Pro-C3	12.1	NG/ML		C4M2	23.7	NG/ML		P4NP7S	241.4	NG/ML
300	W	76	150	1.5	62.4	27.7333	PINP	57.5	NG/ML		C1M	89.1	NG/ML		C3M	14.8	NG/ML		Pro-C3	7.3	NG/ML		C4M2	35.1	NG/ML		P4NP7S	372.2	NG/ML
301	M	69	170	1.7	82.4	28.5121	PINP	27.6	NG/ML		C1M	20.5	NG/ML		C3M	7.8	NG/ML		Pro-C3	6.7	NG/ML		C4M2	18.1	NG/ML		P4NP7S	164.5	NG/ML
302	M	74	163	1.63	82	30.863	PINP	40.9	NG/ML		C1M	27.3	NG/ML		C3M	7.2	NG/ML		Pro-C3	9.3	NG/ML		C4M2	13.7	NG/ML		P4NP7S	141.4	NG/ML
303	W	76	147	1.47	70.3	32.5327	PINP	32.8	NG/ML		C1M	19.9	NG/ML		C3M	10.9	NG/ML		Pro-C3	7.6	NG/ML		C4M2	19.5	NG/ML		P4NP7S	230.1	NG/ML
304	W	67	161	1.61	56.1	21.6427	PINP	43.1	NG/ML		C1M	27.9	NG/ML		C3M	15	NG/ML		Pro-C3	5	NG/ML		C4M2	28.1	NG/ML		P4NP7S	421.1	NG/ML
305	M	67	175	1.75	72.3	23.6082	PINP	36.4	NG/ML		C1M	26.5	NG/ML		C3M	10.6	NG/ML		Pro-C3	6.2	NG/ML		C4M2	22.5	NG/ML		P4NP7S	229.7	NG/ML
306	W	68	154	1.54	47.4	19.9865	PINP	87.6	NG/ML		C1M	20.9	NG/ML		C3M	7.5	NG/ML		Pro-C3	7.1	NG/ML		C4M2	15.4	NG/ML		P4NP7S	159.7	NG/ML
307	M	66	180	1.8	88.2	27.2222	PINP	66.5	NG/ML		C1M	19.5	NG/ML		C3M	8.5	NG/ML		Pro-C3	6.1	NG/ML		C4M2	19.3	NG/ML		P4NP7S	157.8	NG/ML
308	M	67	167	1.67	49.6	17.7848	PINP	48.6	NG/ML		C1M	25.1	NG/ML		C3M	10.9	NG/ML		Pro-C3	17.9	NG/ML		C4M2	21.4	NG/ML		P4NP7S	229.5	NG/ML
309	W	75	163	1.63	84.2	31.6911	PINP	49.5	NG/ML		C1M	25.1	NG/ML		C3M	7.5	NG/ML		Pro-C3	6.4	NG/ML		C4M2	17.8	NG/ML		P4NP7S	157.2	NG/ML
310	M	68	172	1.72	73	24.6755	PINP	36.2	NG/ML		C1M	13.4	NG/ML		C3M	7.1	NG/ML		Pro-C3	6.3	NG/ML		C4M2	15.8	NG/ML		P4NP7S	144.5	NG/ML
311	M	67	179	1.79	71.3	22.2527	PINP	66	NG/ML		C1M	27.5	NG/ML		C3M	9.6	NG/ML		Pro-C3	9.1	NG/ML		C4M2	21	NG/ML		P4NP7S	207	NG/ML
312	W	71	157	1.57	71.2	28.8856	PINP	50.6	NG/ML		C1M	30.8	NG/ML		C3M	11.1	NG/ML		Pro-C3	7.4	NG/ML		C4M2	24	NG/ML		P4NP7S	267.5	NG/ML
313	M	68	169	1.69	89.6	31.3715	PINP	71.4	NG/ML		C1M	28	NG/ML		C3M	9.3	NG/ML		Pro-C3	10.6	NG/ML		C4M2	19.6	NG/ML		P4NP7S	176.2	NG/ML
314	W	76	171	1.71	73.6	25.1701	PINP	38.3	NG/ML		C1M	19.7	NG/ML		C3M	8.8	NG/ML		Pro-C3	6.2	NG/ML		C4M2	18.6	NG/ML		P4NP7S	165.8	NG/ML
315	M	68	181	1.81	88.7	27.0749	PINP	70.3	NG/ML		C1M	19.8	NG/ML		C3M	9.1	NG/ML		Pro-C3	9.2	NG/ML		C4M2	19.6	NG/ML		P4NP7S	191	NG/ML
316	M	69	181	1.81	85.4	26.0676	PINP	32	NG/ML		C1M	30	NG/ML		C3M	8.2	NG/ML		Pro-C3	6.1	NG/ML		C4M2	19.8	NG/ML		P4NP7S	162.6	NG/ML
317	M	36	189	1.89	112.5	31.4941	PINP	75.4	NG/ML		C1M	34.8	NG/ML		C3M	9.3	NG/ML		Pro-C3	10.2	NG/ML		C4M2	14.9	NG/ML		P4NP7S	182	NG/ML
318	M	35	189	1.89	88.6	24.8033	PINP	63.2	NG/ML		C1M	18.7	NG/ML		C3M	8.2	NG/ML		Pro-C3	7.1	NG/ML		C4M2	11	NG/ML		P4NP7S	120.3	NG/ML
319	M	36	178	1.78	120.4	38.0003	PINP	13.9	NG/ML		C1M	31.6	NG/ML		C3M	10.3	NG/ML		Pro-C3	12.7	NG/ML		C4M2	17.1	NG/ML		P4NP7S	190.6	NG/ML
320	W	37	179	1.79	77.3	24.1253	PINP	50.2	NG/ML		C1M	21.9	NG/ML		C3M	8.3	NG/ML		Pro-C3	12.4	NG/ML		C4M2	12.5	NG/ML		P4NP7S	146.3	NG/ML
321	M	36	169	1.69	85.2	29.8309	PINP	57.6	NG/ML		C1M	34.1	NG/ML		C3M	12.3	NG/ML		Pro-C3	8.2	NG/ML		C4M2	19.1	NG/ML		P4NP7S	252.8	NG/ML
322	M	34	180	1.8	88.4	27.284	PINP	122.4	NG/ML		C1M	39.5	NG/ML		C3M	9.8	NG/ML		Pro-C3	8	NG/ML		C4M2	16.1	NG/ML		P4NP7S	171	NG/ML
323	M	30	174	1.74	76	25.1024	PINP	85.9	NG/ML		C1M	30.7	NG/ML		C3M	13	NG/ML		Pro-C3	7.6	NG/ML		C4M2	21.7	NG/ML		P4NP7S	273.9	NG/ML
324	M	32	172	1.72	72	24.3375	PINP	62.3	NG/ML		C1M	33.6	NG/ML		C3M	14.6	NG/ML		Pro-C3	7.1	NG/ML		C4M2	27	NG/ML		P4NP7S	321.7	NG/ML
325	M	37	185	1.85	93	27.1731	PINP	59.3	NG/ML		C1M	22.2	NG/ML		C3M	15.4	NG/ML		Pro-C3	7.5	NG/ML		C4M2	26.1	NG/ML		P4NP7S	319.9	NG/ML
326	M	30	182	1.82	72	21.7365	PINP	99.4	NG/ML		C1M	33.4	NG/ML		C3M	11.1	NG/ML		Pro-C3	9.2	NG/ML		C4M2	15.7	NG/ML		P4NP7S	186.2	NG/ML
327	M	35	170	1.7	78	26.9896	PINP	76.1	NG/ML		C1M	17.8	NG/ML		C3M	9.1	NG/ML		Pro-C3	12	NG/ML		C4M2	14.6	NG/ML		P4NP7S	148.3	NG/ML
328	M	23	178	1.78	73.5	23.1978	PINP	136	NG/ML		C1M	13.9	NG/ML		C3M	7.8	NG/ML		Pro-C3	9.1	NG/ML		C4M2	11.2	NG/ML		P4NP7S	136.9	NG/ML
329	M	35	176	1.76	99	31.9602	PINP	66.6	NG/ML		C1M	26.3	NG/ML		C3M	9.2	NG/ML		Pro-C3	8.6	NG/ML		C4M2	16.2	NG/ML		P4NP7S	182.6	NG/ML
330	W	81	147	1.47	45.6	21.1023	PINP	62.5	NG/ML		C1M	37.2	NG/ML		C3M	10.3	NG/ML		Pro-C3	10.6	NG/ML		C4M2	16.8	NG/ML		P4NP7S	180.5	NG/ML
331	W	37	167	1.67	62.6	22.4461	PINP	118	NG/ML		C1M	43.4	NG/ML		C3M	12.4	NG/ML		Pro-C3	9.7	NG/ML		C4M2	24.2	NG/ML		P4NP7S	255.3	NG/ML
332	M	80	172	1.72	89	30.0838	PINP	53.3	NG/ML		C1M	26.7	NG/ML		C3M	8.7	NG/ML		Pro-C3	8.7	NG/ML		C4M2	15	NG/ML		P4NP7S	146.6	NG/ML
333	M	79	168	1.68	77	27.2817	PINP	44.6	NG/ML		C1M	60.6	NG/ML		C3M	12.9	NG/ML		Pro-C3	8.6	NG/ML		C4M2	20.5	NG/ML		P4NP7S	240.7	NG/ML
334	M	80	171	1.71	75	25.6489	PINP	37.5	NG/ML		C1M	32.9	NG/ML		C3M	11.9	NG/ML		Pro-C3	14.5	NG/ML		C4M2	18.2	NG/ML		P4NP7S	223.1	NG/ML
335	M	67	163	1.63	98.2	36.9604	PINP	54.7	NG/ML		C1M	59.7	NG/ML		C3M	13.4	NG/ML		Pro-C3	14.7	NG/ML		C4M2	27.8	NG/ML		P4NP7S	362	NG/ML
336	M	66	177	1.77	96.6	30.8341	PINP	22.3	NG/ML		C1M	49	NG/ML		C3M	8.3	NG/ML		Pro-C3	6.6	NG/ML		C4M2	20	NG/ML		P4NP7S	190.3	NG/ML
337	M	68	183	1.83	90.7	27.0835	PINP	72.1	NG/ML		C1M	22.5	NG/ML		C3M	12.3	NG/ML		Pro-C3	7.3	NG/ML		C4M2	25.9	NG/ML		P4NP7S	320.5	NG/ML
338	W	68	161	1.61	62.8	24.2275	PINP	31.2	NG/ML		C1M	23.6	NG/ML		C3M	8.8	NG/ML		Pro-C3	7.4	NG/ML		C4M2	18.6	NG/ML		P4NP7S	179.1	NG/ML
339	M	66	172	1.72	91.8	31.0303	PINP	25.6	NG/ML		C1M	33.7	NG/ML		C3M	8.4	NG/ML		Pro-C3	7.3	NG/ML		C4M2	16.8	NG/ML		P4NP7S	164.9	NG/ML
340	M	67	170	1.7	77.3	26.7474	PINP	57.4	NG/ML		C1M	27.8	NG/ML		C3M	7.4	NG/ML		Pro-C3	13.6	NG/ML		C4M2	15.6	NG/ML		P4NP7S	133.7	NG/ML
341	M	67	180	1.8	125.5	38.7346	PINP	31.6	NG/ML		C1M	50.3	NG/ML		C3M	13.7	NG/ML		Pro-C3	9.6	NG/ML		C4M2	30.3	NG/ML		P4NP7S	327.9	NG/ML
342	M	72	169	1.69	82.4	28.8505	PINP	75.3	NG/ML		C1M	25.1	NG/ML		C3M	6.3	NG/ML		Pro-C3	7.8	NG/ML		C4M2	11.9	NG/ML		P4NP7S	118.9	NG/ML
343	M	68	162	1.62	62.5	23.815	PINP	26.7	NG/ML		C1M	19.5	NG/ML		C3M	9.3	NG/ML		Pro-C3		NG/ML		C4M2	16.3	NG/ML		P4NP7S	205.7	NG/ML
344	M	66	162	1.62	69	26.2917	PINP	28.9	NG/ML		C1M	26.4	NG/ML		C3M	8	NG/ML		Pro-C3	6.6	NG/ML		C4M2	14.4	NG/ML		P4NP7S	168.1	NG/ML
345	W	68	160	1.6	56.2	21.9531	PINP	55	NG/ML		C1M	30	NG/ML		C3M	8.9	NG/ML		Pro-C3	8.7	NG/ML		C4M2	17.3	NG/ML		P4NP7S	163.5	NG/ML
346	W	75	160	1.6	63.5	24.8047	PINP	39.7	NG/ML		C1M	27.7	NG/ML		C3M	10.7	NG/ML		Pro-C3	7.1	NG/ML		C4M2	25.9	NG/ML		P4NP7S	235.2	NG/ML
347	W	67	165	1.65	80.5	29.5684	PINP	30.8	NG/ML		C1M	17.8	NG/ML		C3M	8.1	NG/ML		Pro-C3	7	NG/ML		C4M2	15	NG/ML		P4NP7S	156.3	NG/ML
348	W	67	160	1.6	63.7	24.8828	PINP	76	NG/ML		C1M	15.2	NG/ML		C3M	7	NG/ML		Pro-C3	7.5	NG/ML		C4M2	18.3	NG/ML		P4NP7S	134.1	NG/ML
349	W	66	153	1.53	71	30.3302	PINP	77	NG/ML		C1M	31.2	NG/ML		C3M	8.9	NG/ML		Pro-C3	8.8	NG/ML		C4M2	17.3	NG/ML		P4NP7S	189.1	NG/ML
350	M	66	168	1.68	98.3	34.8285	PINP	46.6	NG/ML		C1M	26.2	NG/ML		C3M	9	NG/ML		Pro-C3	16.7	NG/ML		C4M2	18.4	NG/ML		P4NP7S	193.1	NG/ML
351	W	66	159	1.59	65	25.711	PINP	92.9	NG/ML		C1M	25.3	NG/ML		C3M	8.5	NG/ML		Pro-C3	8.1	NG/ML		C4M2	16.8	NG/ML		P4NP7S	172.7	NG/ML
352	W	61	158	1.58	83.3	33.368	PINP	88	NG/ML		C1M	25.5	NG/ML		C3M	11.5	NG/ML		Pro-C3	6.8	NG/ML		C4M2	24.9	NG/ML		P4NP7S	272.9	NG/ML
353	W	69	155	1.55	72.4	30.1353	PINP	67.6	NG/ML		C1M	33.5	NG/ML		C3M	11.9	NG/ML		Pro-C3	9.3	NG/ML		C4M2	36.3	NG/ML		P4NP7S	262.4	NG/ML
354	W	66	160	1.6	72.2	28.2031	PINP	92.7	NG/ML		C1M	35.4	NG/ML		C3M	9.4	NG/ML		Pro-C3	8.9	NG/ML		C4M2	19.5	NG/ML		P4NP7S	203.5	NG/ML
355	M	65	165	1.65	73.3	26.9238	PINP	26.3	NG/ML		C1M	21	NG/ML		C3M	14	NG/ML		Pro-C3	6.3	NG/ML		C4M2	24.2	NG/ML		P4NP7S	301.7	NG/ML
356	M	66	174	1.74	69.3	22.8894	PINP	68.6	NG/ML		C1M	47.5	NG/ML		C3M	9.3	NG/ML		Pro-C3	20	NG/ML		C4M2	19.6	NG/ML		P4NP7S	228.7	NG/ML
357	W	69	156	1.56	46.7	19.1897	PINP	59.9	NG/ML		C1M	13.6	NG/ML		C3M	9.1	NG/ML		Pro-C3	5.4	NG/ML		C4M2	19.2	NG/ML		P4NP7S	189.5	NG/ML
358	W	69	171	1.71	61.2	20.9295	PINP	61	NG/ML		C1M	27.5	NG/ML		C3M	11.4	NG/ML		Pro-C3	7.2	NG/ML		C4M2	22.7	NG/ML		P4NP7S	278.6	NG/ML
359	W	65	163	1.63	62.7	23.5989	PINP	96.8	NG/ML		C1M	19.4	NG/ML		C3M	7.7	NG/ML		Pro-C3	8	NG/ML		C4M2	14.4	NG/ML		P4NP7S	165.4	NG/ML
360	W	76	157	1.57	69.7	28.277	PINP	44.6	NG/ML		C1M	29.8	NG/ML		C3M	8.6	NG/ML		Pro-C3	7.2	NG/ML		C4M2	17.8	NG/ML		P4NP7S	181.4	NG/ML
361	W	63	158	1.58	59.8	23.9545	PINP	131	NG/ML		C1M	46.3	NG/ML		C3M	9.6	NG/ML		Pro-C3	17	NG/ML		C4M2	22	NG/ML		P4NP7S	294.4	NG/ML
362	W	60	161	1.61	75.9	29.2813	PINP	18.9	NG/ML		C1M	30	NG/ML		C3M	9.4	NG/ML		Pro-C3	9.7	NG/ML		C4M2	16.1	NG/ML		P4NP7S	176.8	NG/ML
363	W	66	166	1.66	84.2	30.556	PINP	56.5	NG/ML		C1M	37.3	NG/ML		C3M	14.7	NG/ML		Pro-C3	11.2	NG/ML		C4M2	30.7	NG/ML		P4NP7S	388.5	NG/ML
364	W	67	152	1.52	62	26.8352	PINP	29.9	NG/ML		C1M	22	NG/ML		C3M	9.9	NG/ML		Pro-C3	5.8	NG/ML		C4M2	20.5	NG/ML		P4NP7S	237.1	NG/ML
365	W	67	168	1.68	63.5	22.4986	PINP	76.8	NG/ML		C1M	27.5	NG/ML		C3M	11.7	NG/ML		Pro-C3	7.1	NG/ML		C4M2	21.8	NG/ML		P4NP7S	304.3	NG/ML
366	W	62	163	1.63	60	22.5827	PINP	62.1	NG/ML		C1M	15.3	NG/ML		C3M	5	NG/ML		Pro-C3	8	NG/ML		C4M2	11.2	NG/ML		P4NP7S	105.1	NG/ML
367	W	63	161	1.61	61.6	23.7645	PINP	97	NG/ML		C1M	53	NG/ML		C3M	10.8	NG/ML		Pro-C3	12.8	NG/ML		C4M2	24.7	NG/ML		P4NP7S	237	NG/ML
368	M	64	180	1.8	77	23.7654	PINP	56.2	NG/ML		C1M	66.1	NG/ML		C3M	15.8	NG/ML		Pro-C3	9	NG/ML		C4M2	28.7	NG/ML		P4NP7S	451.9	NG/ML
369	M	61	173	1.73	104.4	34.8826	PINP	31.7	NG/ML		C1M	23.9	NG/ML		C3M	6.3	NG/ML		Pro-C3	8.7	NG/ML		C4M2	17.2	NG/ML		P4NP7S	152.4	NG/ML
370	W	61	154	1.54	55.4	23.3598	PINP	72.9	NG/ML		C1M	20.8	NG/ML		C3M	11.4	NG/ML		Pro-C3	6.2	NG/ML		C4M2	23.9	NG/ML		P4NP7S	287.9	NG/ML
371	M	67	173	1.73	68.6	22.9209	PINP	29.9	NG/ML		C1M	23.1	NG/ML		C3M	7.1	NG/ML		Pro-C3	7.5	NG/ML		C4M2	14.4	NG/ML		P4NP7S	152.8	NG/ML
372	W	69	165	1.65	55.6	20.4224	PINP	46.5	NG/ML		C1M	26.4	NG/ML		C3M	6.7	NG/ML		Pro-C3	4.3	NG/ML		C4M2	15.3	NG/ML		P4NP7S	142.9	NG/ML
373	W	75	169	1.69	62	21.7079	PINP	97.9	NG/ML		C1M	27.4	NG/ML		C3M	7.1	NG/ML		Pro-C3	7.3	NG/ML		C4M2	13.2	NG/ML		P4NP7S	148.1	NG/ML
374	M	61	177	1.77	81.4	25.9823	PINP	19	NG/ML		C1M	27.3	NG/ML		C3M	8.3	NG/ML		Pro-C3	7.2	NG/ML		C4M2	19.6	NG/ML		P4NP7S	191.1	NG/ML
375	W	66	164	1.64	71.3	26.5095	PINP	49.3	NG/ML		C1M	34.1	NG/ML		C3M	9.6	NG/ML		Pro-C3	8.8	NG/ML		C4M2	17.5	NG/ML		P4NP7S	176.5	NG/ML
376	M	62	173	1.73	74.3	24.8254	PINP	40	NG/ML		C1M	23.9	NG/ML		C3M	6.9	NG/ML		Pro-C3	10.5	NG/ML		C4M2	14.9	NG/ML		P4NP7S	133.7	NG/ML
377	M	64	182	1.82	109	32.9067	PINP	33.8	NG/ML		C1M	40.7	NG/ML		C3M	13.9	NG/ML		Pro-C3	8.9	NG/ML		C4M2	25.3	NG/ML		P4NP7S	297.4	NG/ML
378	W	63	154	1.54	67.4	28.4196	PINP	47.6	NG/ML		C1M	64.8	NG/ML		C3M	11.8	NG/ML		Pro-C3	6.5	NG/ML		C4M2	26.5	NG/ML		P4NP7S	308.4	NG/ML
379	W	62	159	1.59	77	30.4577	PINP	78.5	NG/ML		C1M	26.8	NG/ML		C3M	9.3	NG/ML		Pro-C3	8.7	NG/ML		C4M2	19.2	NG/ML		P4NP7S	221.5	NG/ML
380	W	63	158	1.58	68.4	27.3995	PINP	84.8	NG/ML		C1M	34.1	NG/ML		C3M	10.7	NG/ML		Pro-C3	8.1	NG/ML		C4M2	21.4	NG/ML		P4NP7S	270.8	NG/ML
381	W	61	160	1.6	67.8	26.4844	PINP	55	NG/ML		C1M	24.8	NG/ML		C3M	7.3	NG/ML		Pro-C3	5.4	NG/ML		C4M2	15.4	NG/ML		P4NP7S	152.7	NG/ML
382	M	65	181	1.81	96.1	29.3337	PINP	36	NG/ML		C1M	30.4	NG/ML		C3M	8.9	NG/ML		Pro-C3	6.4	NG/ML		C4M2	17	NG/ML		P4NP7S	212.4	NG/ML
383	M	64	168	1.68	75.8	26.8566	PINP	32.3	NG/ML		C1M	49	NG/ML		C3M	12.1	NG/ML		Pro-C3	5.8	NG/ML		C4M2	25.9	NG/ML		P4NP7S	304.3	NG/ML
384	W	64	163	1.63	55.3	20.8137	PINP	68.7	NG/ML		C1M	18.6	NG/ML		C3M	7.2	NG/ML		Pro-C3	6.2	NG/ML		C4M2	17.3	NG/ML		P4NP7S	154.6	NG/ML
385	W	64	155	1.55	76.7	31.9251	PINP	59.4	NG/ML		C1M	22.5	NG/ML		C3M	7.6	NG/ML		Pro-C3	9.7	NG/ML		C4M2	17	NG/ML		P4NP7S	161.5	NG/ML
386	W	64	162	1.62	53.9	20.538	PINP	35.1	NG/ML		C1M	16.6	NG/ML		C3M	5.4	NG/ML		Pro-C3	5.8	NG/ML		C4M2	13.1	NG/ML		P4NP7S	103.8	NG/ML
387	M	63	170	1.7	89.2	30.8651	PINP	39	NG/ML		C1M	28.1	NG/ML		C3M	8.3	NG/ML		Pro-C3	25.8	NG/ML		C4M2	18	NG/ML		P4NP7S	213.9	NG/ML
388	M	60	178	1.78	106.8	33.7079	PINP	33.2	NG/ML		C1M	29.6	NG/ML		C3M	7.8	NG/ML		Pro-C3	11.4	NG/ML		C4M2	14.4	NG/ML		P4NP7S	180.9	NG/ML
389	W	61	167	1.67	76.2	27.3226	PINP	27.5	NG/ML		C1M	41.7	NG/ML		C3M	8.9	NG/ML		Pro-C3	5.8	NG/ML		C4M2	17.5	NG/ML		P4NP7S	216.6	NG/ML
390	W	63	163	1.63	74.2	27.9273	PINP	40.5	NG/ML		C1M	123.9	NG/ML		C3M	8.9	NG/ML		Pro-C3	9.1	NG/ML		C4M2	17.5	NG/ML		P4NP7S	228.9	NG/ML
391	W	62	172	1.72	92.3	31.1993	PINP	63	NG/ML		C1M	36.1	NG/ML		C3M	11.1	NG/ML		Pro-C3	12.8	NG/ML		C4M2	19.4	NG/ML		P4NP7S	274.8	NG/ML
392	M	64	174	1.74	87.6	28.9338	PINP	29.9	NG/ML		C1M	20.9	NG/ML		C3M	7	NG/ML		Pro-C3	8.3	NG/ML		C4M2	15.1	NG/ML		P4NP7S	178	NG/ML
393	M	63	178	1.78	72.5	22.8822	PINP	50.3	NG/ML		C1M	18.6	NG/ML		C3M	6.2	NG/ML		Pro-C3	10.2	NG/ML		C4M2	9.9	NG/ML		P4NP7S	117.5	NG/ML
394	W	63	167	1.67	58.2	20.8684	PINP	45.1	NG/ML		C1M	24.6	NG/ML		C3M	8.2	NG/ML		Pro-C3	7.2	NG/ML		C4M2	16.9	NG/ML		P4NP7S	182.5	NG/ML
395	W	62	158	1.58	75.8	30.3637	PINP	48.8	NG/ML		C1M	33.9	NG/ML		C3M	8.7	NG/ML		Pro-C3	8.3	NG/ML		C4M2	16.9	NG/ML		P4NP7S	186.5	NG/ML
396	W	64	164	1.64	76.7	28.5173	PINP	75	NG/ML		C1M	27.5	NG/ML		C3M	7	NG/ML		Pro-C3	6.7	NG/ML		C4M2	12.8	NG/ML		P4NP7S	148.7	NG/ML
397	W	65	170	1.7	84.2	29.1349	PINP	12.6	NG/ML		C1M	23.7	NG/ML		C3M	9.7	NG/ML		Pro-C3	6.2	NG/ML		C4M2	20	NG/ML		P4NP7S	242.9	NG/ML
398	W	64	159	1.59	66	26.1066	PINP	100.6	NG/ML		C1M	15.6	NG/ML		C3M	5.2	NG/ML		Pro-C3	16.2	NG/ML		C4M2	10.9	NG/ML		P4NP7S	101.8	NG/ML
399	W	61	164	1.64	63.7	23.6838	PINP	77.5	NG/ML		C1M	22.7	NG/ML		C3M	10.1	NG/ML		Pro-C3	6.3	NG/ML		C4M2	21.3	NG/ML		P4NP7S	266.1	NG/ML
400	W	63	164	1.64	66.5	24.7249	PINP	97.4	NG/ML		C1M	32.5	NG/ML		C3M	10.1	NG/ML		Pro-C3	7.5	NG/ML		C4M2	23.4	NG/ML		P4NP7S	290.7	NG/ML
401	W	63	163	1.63	67	25.2174	PINP	50.6	NG/ML		C1M	17.2	NG/ML		C3M	8.8	NG/ML		Pro-C3	6	NG/ML		C4M2	20.9	NG/ML		P4NP7S	250.4	NG/ML
402	M	63	179	1.79	81.3	25.3737	PINP	31.7	NG/ML		C1M	46.4	NG/ML		C3M	11.3	NG/ML		Pro-C3	6.1	NG/ML		C4M2	25.2	NG/ML		P4NP7S	283.2	NG/ML
403	W	65	158	1.58	60	24.0346	PINP	107.3	NG/ML		C1M	24.8	NG/ML		C3M	12.8	NG/ML		Pro-C3	6.4	NG/ML		C4M2	26.3	NG/ML		P4NP7S	353	NG/ML
404	W	62	170	1.7	81	28.0277	PINP	66.3	NG/ML		C1M	26.6	NG/ML		C3M	8.5	NG/ML		Pro-C3	9.3	NG/ML		C4M2	20.4	NG/ML		P4NP7S	173.6	NG/ML
405	M	63	186	1.86	101	29.1941	PINP	31.5	NG/ML		C1M	29.4	NG/ML		C3M	8	NG/ML		Pro-C3	15.3	NG/ML		C4M2	14.6	NG/ML		P4NP7S	194.5	NG/ML
406	W	61	157	1.57	64.5	26.1674	PINP	33.5	NG/ML		C1M	24.4	NG/ML		C3M	11.1	NG/ML		Pro-C3	6.8	NG/ML		C4M2	23.3	NG/ML		P4NP7S	204.4	NG/ML
407	M	63	167	1.67	88	31.5537	PINP	106.3	NG/ML		C1M	25.8	NG/ML		C3M	7.9	NG/ML		Pro-C3	10.7	NG/ML		C4M2	14.7	NG/ML		P4NP7S	131.1	NG/ML
408	W	62	161	1.61	62.7	24.1889	PINP	95	NG/ML		C1M	20.7	NG/ML		C3M	6.2	NG/ML		Pro-C3	7.8	NG/ML		C4M2	14	NG/ML		P4NP7S	106.2	NG/ML
409	M	62	168	1.68	75.4	26.7149	PINP	22.4	NG/ML		C1M	15.8	NG/ML		C3M	11.9	NG/ML		Pro-C3	4.6	NG/ML		C4M2	23	NG/ML		P4NP7S	250.4	NG/ML
410	M	64	185	1.85	86.6	25.3031	PINP	37.1	NG/ML		C1M	18.3	NG/ML		C3M	12	NG/ML		Pro-C3	7.7	NG/ML		C4M2	21.3	NG/ML		P4NP7S	226.9	NG/ML
411	M	58	176	1.76	96.1	31.024	PINP	40.9	NG/ML		C1M	18.2	NG/ML		C3M	6.7	NG/ML		Pro-C3	9.3	NG/ML		C4M2	14.4	NG/ML		P4NP7S	123.2	NG/ML
412	W	59	156	1.56	62.5	25.6821	PINP	66.3	NG/ML		C1M	16.7	NG/ML		C3M	12	NG/ML		Pro-C3	7.1	NG/ML		C4M2	20.6	NG/ML		P4NP7S	207.7	NG/ML
413	M	64	166	1.66	72	26.1286	PINP	79	NG/ML		C1M	25.5	NG/ML		C3M	11.3	NG/ML		Pro-C3	6.2	NG/ML		C4M2	20	NG/ML		P4NP7S	204.6	NG/ML
414	W	55	162	1.62	67.3	25.644	PINP	59.9	NG/ML		C1M	23.6	NG/ML		C3M	12.8	NG/ML		Pro-C3	8.5	NG/ML		C4M2	24.2	NG/ML		P4NP7S	241.1	NG/ML
415	M	51	184	1.84	83	24.5156	PINP	65.2	NG/ML		C1M	26.2	NG/ML		C3M	8.5	NG/ML		Pro-C3	6.7	NG/ML		C4M2	14.5	NG/ML		P4NP7S	140.4	NG/ML
416	M	63	167	1.67	70.3	25.2071	PINP	14.5	NG/ML		C1M	31.2	NG/ML		C3M	13.5	NG/ML		Pro-C3	6.4	NG/ML		C4M2	22.7	NG/ML		P4NP7S	251.2	NG/ML
417	W	52	173	1.73	69	23.0546	PINP	48.3	NG/ML		C1M	28.2	NG/ML		C3M	12.8	NG/ML		Pro-C3	9	NG/ML		C4M2	22.7	NG/ML		P4NP7S	251.6	NG/ML
418	M	53	179	1.79	89	27.7769	PINP	46.8	NG/ML		C1M	18.5	NG/ML		C3M	12.6	NG/ML		Pro-C3	8.5	NG/ML		C4M2	19.4	NG/ML		P4NP7S	217.6	NG/ML
419	W	51	165	1.65	63	23.1405	PINP	99.4	NG/ML		C1M	39.3	NG/ML		C3M	11.2	NG/ML		Pro-C3	8.8	NG/ML		C4M2	20.8	NG/ML		P4NP7S	206.8	NG/ML
420	M	55	184	1.84	101	29.8322	PINP	39.8	NG/ML		C1M	15.6	NG/ML		C3M	8.2	NG/ML		Pro-C3	9.9	NG/ML		C4M2	10.1	NG/ML		P4NP7S	129.9	NG/ML
421	M	62	171	1.71	83	28.3848	PINP	33.6	NG/ML		C1M	18.9	NG/ML		C3M	10.1	NG/ML		Pro-C3	8.8	NG/ML		C4M2	19.5	NG/ML		P4NP7S	175	NG/ML
422	M	60	176	1.76	80	25.8264	PINP	26.8	NG/ML		C1M	24.9	NG/ML		C3M	14	NG/ML		Pro-C3	9.3	NG/ML		C4M2	26.2	NG/ML		P4NP7S	256.3	NG/ML
423	M	56	173	1.73	62	20.7157	PINP	34.6	NG/ML		C1M	20.6	NG/ML		C3M	9.4	NG/ML		Pro-C3	5.6	NG/ML		C4M2	14.8	NG/ML		P4NP7S	148.4	NG/ML
424	M	52	182	1.82	76	22.9441	PINP	32.8	NG/ML		C1M	37.5	NG/ML		C3M	11	NG/ML		Pro-C3	6.8	NG/ML		C4M2	21.6	NG/ML		P4NP7S	215.6	NG/ML
425	W	58	161	1.61	65	25.0762	PINP	55.6	NG/ML		C1M	29.4	NG/ML		C3M	22.1	NG/ML		Pro-C3	9	NG/ML		C4M2	35.5	NG/ML		P4NP7S	501.3	NG/ML
426	W	55	164	1.64	68.4	25.4313	PINP	33.7	NG/ML		C1M	23	NG/ML		C3M	11.8	NG/ML		Pro-C3	5.2	NG/ML		C4M2	25.2	NG/ML		P4NP7S	220.5	NG/ML
427	M	55	180	1.8	85	26.2346	PINP	53	NG/ML		C1M	25.5	NG/ML		C3M	11.8	NG/ML		Pro-C3	8.2	NG/ML		C4M2	20.8	NG/ML		P4NP7S	214.1	NG/ML
428	M	58	179	1.79	69	21.5349	PINP	30.8	NG/ML		C1M	27.8	NG/ML		C3M	11.1	NG/ML		Pro-C3	7.7	NG/ML		C4M2	18.5	NG/ML		P4NP7S	189.9	NG/ML
429	M	59	162	1.62	68	25.9107	PINP	32.4	NG/ML		C1M	26.6	NG/ML		C3M	14.8	NG/ML		Pro-C3	6.8	NG/ML		C4M2	27.3	NG/ML		P4NP7S	324.8	NG/ML
430	W	37	161	1.61	55.9	21.5655	PINP	43	NG/ML		C1M	15.8	NG/ML		C3M	8.5	NG/ML		Pro-C3	8	NG/ML		C4M2	12.2	NG/ML		P4NP7S	157.9	NG/ML
431	M	59	178	1.78	96	30.2992	PINP	43.6	NG/ML		C1M	17.8	NG/ML		C3M	11.5	NG/ML		Pro-C3	8.7	NG/ML		C4M2	17	NG/ML		P4NP7S	175.6	NG/ML
432	W	59	158	1.58	63	25.2363	PINP	78.8	NG/ML		C1M	18.5	NG/ML		C3M	7.4	NG/ML		Pro-C3	6.3	NG/ML		C4M2	14.4	NG/ML		P4NP7S	144.2	NG/ML
433	W	60	167	1.67	108.5	38.9042	PINP	33.9	NG/ML		C1M	30.9	NG/ML		C3M	14	NG/ML		Pro-C3	10	NG/ML		C4M2	25.9	NG/ML		P4NP7S	273.7	NG/ML
434	M	64	170	1.7	82	28.3737	PINP	33.3	NG/ML		C1M		NG/ML		C3M	21.7	NG/ML		Pro-C3	8.4	NG/ML		C4M2	59.4	NG/ML		P4NP7S	593.9	NG/ML
435	W	53	164	1.64	72.6	26.9929	PINP	78.8	NG/ML		C1M	27.1	NG/ML		C3M	11.8	NG/ML		Pro-C3	4.5	NG/ML		C4M2	20.8	NG/ML		P4NP7S	199.6	NG/ML
436	W	57	169	1.69	85.6	29.9709	PINP	43.3	NG/ML		C1M	29.3	NG/ML		C3M	13.8	NG/ML		Pro-C3	6.5	NG/ML		C4M2	23.5	NG/ML		P4NP7S	240.1	NG/ML
437	W	58	170	1.7	63	21.7993	PINP	66.5	NG/ML		C1M	19.6	NG/ML		C3M	14.8	NG/ML		Pro-C3	6.8	NG/ML		C4M2	28	NG/ML		P4NP7S	269.5	NG/ML
438	W	50	162	1.62	58	22.1003	PINP	24.7	NG/ML		C1M	18.4	NG/ML		C3M	7.6	NG/ML		Pro-C3	7.4	NG/ML		C4M2	14.6	NG/ML		P4NP7S	143.5	NG/ML
439	W	60	163	1.63	62	23.3355	PINP	94.3	NG/ML		C1M	41.4	NG/ML		C3M	14.9	NG/ML		Pro-C3	10.4	NG/ML		C4M2	30.5	NG/ML		P4NP7S	319.3	NG/ML
440	W	57	169	1.69	84.2	29.4808	PINP	50.1	NG/ML		C1M	41.9	NG/ML		C3M	19.1	NG/ML		Pro-C3	7.1	NG/ML		C4M2	31.8	NG/ML		P4NP7S	417.6	NG/ML
441	W	55	162	1.62	60.4	23.0148	PINP	134.2	NG/ML		C1M	24.7	NG/ML		C3M	8.1	NG/ML		Pro-C3	8.5	NG/ML		C4M2	16.3	NG/ML		P4NP7S	159.3	NG/ML
442	M	54	186	1.86	87.4	25.263	PINP	44.7	NG/ML		C1M	31.1	NG/ML		C3M	10.4	NG/ML		Pro-C3	15.4	NG/ML		C4M2	20.1	NG/ML		P4NP7S	212.2	NG/ML
443	W	56	166	1.66	84.4	30.6285	PINP	39.5	NG/ML		C1M	24.1	NG/ML		C3M	14.5	NG/ML		Pro-C3	8.6	NG/ML		C4M2	26.1	NG/ML		P4NP7S	332.1	NG/ML
444	W	58	166	1.66	74.6	27.0721	PINP	42.4	NG/ML		C1M	16.5	NG/ML		C3M	11.1	NG/ML		Pro-C3	6.9	NG/ML		C4M2	21.8	NG/ML		P4NP7S	227	NG/ML
445	W	51	162	1.62	56.6	21.5668	PINP	54.9	NG/ML		C1M	26.5	NG/ML		C3M	10.5	NG/ML		Pro-C3	8.1	NG/ML		C4M2	20.3	NG/ML		P4NP7S	200.3	NG/ML
446	W	52	162	1.62	74	28.1969	PINP	41.3	NG/ML		C1M	14.7	NG/ML		C3M	11	NG/ML		Pro-C3	8.5	NG/ML		C4M2	23.8	NG/ML		P4NP7S	226.8	NG/ML
447	W	54	172	1.72	83.4	28.1909	PINP	50.2	NG/ML		C1M	17.3	NG/ML		C3M	9.9	NG/ML		Pro-C3	7.1	NG/ML		C4M2	19.1	NG/ML		P4NP7S	204.1	NG/ML
448	W	55	163	1.63	70.5	26.5347	PINP	86	NG/ML		C1M	17.8	NG/ML		C3M	12	NG/ML		Pro-C3	6.1	NG/ML		C4M2	21.8	NG/ML		P4NP7S	243.3	NG/ML
449	W	59	155	1.55	61.3	25.5151	PINP	47.5	NG/ML		C1M	23.2	NG/ML		C3M	8.7	NG/ML		Pro-C3	4.2	NG/ML		C4M2	17.2	NG/ML		P4NP7S	198	NG/ML
450	M	52	178	1.78	77.7	24.5234	PINP	95.4	NG/ML		C1M	18.8	NG/ML		C3M	8.3	NG/ML		Pro-C3	11.3	NG/ML		C4M2	14.8	NG/ML		P4NP7S	159.8	NG/ML
451	M	55	172	1.72	91.5	30.9289	PINP	49	NG/ML		C1M	25.7	NG/ML		C3M	13	NG/ML		Pro-C3	12.6	NG/ML		C4M2	23	NG/ML		P4NP7S	290.8	NG/ML
452	M	50	183	1.83	71.9	21.4697	PINP	91.2	NG/ML		C1M	13.9	NG/ML		C3M	7.9	NG/ML		Pro-C3	7.8	NG/ML		C4M2	14.7	NG/ML		P4NP7S	164	NG/ML
453	W	51	163	1.63	65.5	24.6528	PINP	55.4	NG/ML		C1M	17.3	NG/ML		C3M	9	NG/ML		Pro-C3	4.9	NG/ML		C4M2	16.5	NG/ML		P4NP7S	183.2	NG/ML
454	W	58	170	1.7	61.3	21.2111	PINP	75.6	NG/ML		C1M	19.1	NG/ML		C3M	9.5	NG/ML		Pro-C3	6.4	NG/ML		C4M2	17.6	NG/ML		P4NP7S	198.6	NG/ML
455	W	51	170	1.7	90.5	31.3149	PINP	96	NG/ML		C1M	34.1	NG/ML		C3M	11.6	NG/ML		Pro-C3	9.8	NG/ML		C4M2	18.6	NG/ML		P4NP7S	252.1	NG/ML
456	M	52	187	1.87	99	28.3108	PINP	46.5	NG/ML		C1M	17.6	NG/ML		C3M	10.1	NG/ML		Pro-C3	6.3	NG/ML		C4M2	18.4	NG/ML		P4NP7S	186.7	NG/ML
457	M	54	182	1.82	103.2	31.1557	PINP	53.8	NG/ML		C1M	18.1	NG/ML		C3M	8.9	NG/ML		Pro-C3	8.6	NG/ML		C4M2	14.7	NG/ML		P4NP7S	166.7	NG/ML
458	M	54	179	1.79	101	31.5221	PINP	83.2	NG/ML		C1M	20.5	NG/ML		C3M	9	NG/ML		Pro-C3	7.5	NG/ML		C4M2	16.8	NG/ML		P4NP7S	174	NG/ML
459	W	55	162	1.62	78.3	29.8354	PINP	82.1	NG/ML		C1M	18.8	NG/ML		C3M	13.6	NG/ML		Pro-C3	4.5	NG/ML		C4M2	23.8	NG/ML		P4NP7S	297	NG/ML
460	W	54	168	1.68	62.7	22.2151	PINP	77.5	NG/ML		C1M	20	NG/ML		C3M	14.2	NG/ML		Pro-C3	5.3	NG/ML		C4M2	23.5	NG/ML		P4NP7S	285.1	NG/ML
461	M	53	171	1.71	75	25.6489	PINP	74.7	NG/ML		C1M	14.2	NG/ML		C3M	12.8	NG/ML		Pro-C3	6.4	NG/ML		C4M2	26.2	NG/ML		P4NP7S	287.6	NG/ML
462	M	53	187	1.87	59.7	17.0723	PINP	38.2	NG/ML		C1M	23.4	NG/ML		C3M	12.4	NG/ML		Pro-C3	6.6	NG/ML		C4M2	16.3	NG/ML		P4NP7S	230.2	NG/ML
463	W	60	159	1.59	53	20.9644	PINP	103.5	NG/ML		C1M	20.1	NG/ML		C3M	12.4	NG/ML		Pro-C3	8	NG/ML		C4M2	23.4	NG/ML		P4NP7S	245	NG/ML
464	W	57	167	1.67	70	25.0995	PINP	78.9	NG/ML		C1M	64.4	NG/ML		C3M	10.4	NG/ML		Pro-C3	5	NG/ML		C4M2	18.6	NG/ML		P4NP7S	204.4	NG/ML
465	M	60	197	1.97	97	24.9942	PINP	48	NG/ML		C1M	18.2	NG/ML		C3M	9.9	NG/ML		Pro-C3	8.7	NG/ML		C4M2	19.1	NG/ML		P4NP7S	200.3	NG/ML
466	W	54	158	1.58	51.8	20.7499	PINP	90.4	NG/ML		C1M	17.3	NG/ML		C3M	11.9	NG/ML		Pro-C3	4.7	NG/ML		C4M2	22	NG/ML		P4NP7S	236.3	NG/ML
467	W	59	162	1.62	64	24.3865	PINP	69	NG/ML		C1M	26.7	NG/ML		C3M	12.1	NG/ML		Pro-C3	9.8	NG/ML		C4M2	23	NG/ML		P4NP7S	226.3	NG/ML
468	W	53	156	1.56	74.4	30.572	PINP	55	NG/ML		C1M	26	NG/ML		C3M	14.6	NG/ML		Pro-C3	6.8	NG/ML		C4M2	26.1	NG/ML		P4NP7S	297.7	NG/ML
469	M	59	167	1.67	77	27.6095	PINP	54.8	NG/ML		C1M	25.3	NG/ML		C3M	17.5	NG/ML		Pro-C3	10.7	NG/ML		C4M2	31	NG/ML		P4NP7S	403.6	NG/ML
470	W	57	161	1.61	61	23.533	PINP	52.7	NG/ML		C1M	22.3	NG/ML		C3M	10.4	NG/ML		Pro-C3	4.9	NG/ML		C4M2	16.5	NG/ML		P4NP7S	176.6	NG/ML
471	W	56	166	1.66	77	27.9431	PINP	38.2	NG/ML		C1M	31.6	NG/ML		C3M	14.3	NG/ML		Pro-C3	6.7	NG/ML		C4M2	30.3	NG/ML		P4NP7S	361.4	NG/ML
472	W	54	169	1.69	104	36.4133	PINP	66.6	NG/ML		C1M	32.2	NG/ML		C3M	13.9	NG/ML		Pro-C3	7.6	NG/ML		C4M2	30.8	NG/ML		P4NP7S	322.6	NG/ML
473	W	59	161	1.61	58	22.3757	PINP	51.1	NG/ML		C1M	27.5	NG/ML		C3M	10.4	NG/ML		Pro-C3	9.5	NG/ML		C4M2	23.6	NG/ML		P4NP7S	206.2	NG/ML
474	W	55	162	1.62	50	19.052	PINP	61.4	NG/ML		C1M	16.1	NG/ML		C3M	9.7	NG/ML		Pro-C3	5	NG/ML		C4M2	22.2	NG/ML		P4NP7S	195.3	NG/ML
475	W	52	171	1.71	66	22.571	PINP	44.8	NG/ML		C1M	25.4	NG/ML		C3M	11.2	NG/ML		Pro-C3	8	NG/ML		C4M2	21.3	NG/ML		P4NP7S	231.5	NG/ML
476	W	52	165	1.65	57	20.9366	PINP	40.4	NG/ML		C1M	16.5	NG/ML		C3M	9.5	NG/ML		Pro-C3	9.7	NG/ML		C4M2	18	NG/ML		P4NP7S	188	NG/ML
477	W	52	167	1.67	62.4	22.3744	PINP	144.8	NG/ML		C1M	17	NG/ML		C3M	6.9	NG/ML		Pro-C3	7.8	NG/ML		C4M2	14.8	NG/ML		P4NP7S	151.4	NG/ML
478	W	54	166	1.66	92	33.3866	PINP	52.6	NG/ML		C1M	36.7	NG/ML		C3M	12.1	NG/ML		Pro-C3	13.5	NG/ML		C4M2	25	NG/ML		P4NP7S	293.3	NG/ML
479	M	55	182	1.82	90	27.1706	PINP	53.7	NG/ML		C1M	29.8	NG/ML		C3M	8.3	NG/ML		Pro-C3	8.1	NG/ML		C4M2	17.9	NG/ML		P4NP7S	183.5	NG/ML
480	W	52	168	1.68	61	21.6128	PINP	16.8	NG/ML		C1M	20.9	NG/ML		C3M	5.3	NG/ML		Pro-C3	6.6	NG/ML		C4M2	11.1	NG/ML		P4NP7S	102.5	NG/ML
481	W	52	163	1.63	57	21.4536	PINP	66.4	NG/ML		C1M	17	NG/ML		C3M	7.7	NG/ML		Pro-C3	7.1	NG/ML		C4M2	16.5	NG/ML		P4NP7S	165.4	NG/ML
482	W	60	161	1.61	61	23.533	PINP	47.6	NG/ML		C1M	19.6	NG/ML		C3M	7.1	NG/ML		Pro-C3	6.1	NG/ML		C4M2	14.7	NG/ML		P4NP7S	145.2	NG/ML
483	W	53	158	1.58	68	27.2392	PINP	15.4	NG/ML		C1M	18.7	NG/ML		C3M	6.8	NG/ML		Pro-C3	8.2	NG/ML		C4M2	14.2	NG/ML		P4NP7S	145.2	NG/ML
484	M	56	159	1.59	56.7	22.4279	PINP	79	NG/ML		C1M	36.9	NG/ML		C3M	8.9	NG/ML		Pro-C3	6.5	NG/ML		C4M2	20.8	NG/ML		P4NP7S	203.4	NG/ML
485	W	58	165	1.65	87	31.9559	PINP	38.3	NG/ML		C1M	26	NG/ML		C3M	10.2	NG/ML		Pro-C3	9.5	NG/ML		C4M2	21.2	NG/ML		P4NP7S	223.1	NG/ML
486	M	58	180	1.8	92	28.3951	PINP	52.6	NG/ML		C1M	28	NG/ML		C3M	10.1	NG/ML		Pro-C3	9	NG/ML		C4M2	17.7	NG/ML		P4NP7S	213.3	NG/ML
487	W	57	164	1.64	68	25.2826	PINP	37	NG/ML		C1M	54.8	NG/ML		C3M	16.1	NG/ML		Pro-C3	5.3	NG/ML		C4M2	29.9	NG/ML		P4NP7S	366.6	NG/ML
488	W	55	175	1.75	63	20.5714	PINP	50.2	NG/ML		C1M	25.1	NG/ML		C3M	12.6	NG/ML		Pro-C3	7.3	NG/ML		C4M2	21.1	NG/ML		P4NP7S	254.9	NG/ML
489	W	56	161	1.61	73	28.1625	PINP	72.5	NG/ML		C1M	39	NG/ML		C3M	9.8	NG/ML		Pro-C3	11.2	NG/ML		C4M2	17.7	NG/ML		P4NP7S	233.5	NG/ML
490	M	60	188	1.88	91	25.7469	PINP	28.6	NG/ML		C1M	24.7	NG/ML		C3M	9.3	NG/ML		Pro-C3	7.8	NG/ML		C4M2	14.2	NG/ML		P4NP7S	185.4	NG/ML
491	W	60	159	1.59	85	33.6221	PINP	70.5	NG/ML		C1M	48.6	NG/ML		C3M	12.2	NG/ML		Pro-C3	8.4	NG/ML		C4M2	21.9	NG/ML		P4NP7S	287.5	NG/ML
492	M	56	166	1.66	95	34.4753	PINP	39.1	NG/ML		C1M	40.3	NG/ML		C3M	19.9	NG/ML		Pro-C3	7	NG/ML		C4M2	28.6	NG/ML		P4NP7S	440.2	NG/ML
493	M	56	180	1.8	93	28.7037	PINP	42.3	NG/ML		C1M	19.9	NG/ML		C3M	8.8	NG/ML		Pro-C3	9.9	NG/ML		C4M2	15.4	NG/ML		P4NP7S	178.6	NG/ML
494	W	60	164	1.64	60	22.3081	PINP	39.8	NG/ML		C1M	23	NG/ML		C3M	12.6	NG/ML		Pro-C3	5.8	NG/ML		C4M2	23.2	NG/ML		P4NP7S	283.7	NG/ML
495	M	58	176	1.76	79	25.5036	PINP	56.6	NG/ML		C1M	39.2	NG/ML		C3M	11.3	NG/ML		Pro-C3	14	NG/ML		C4M2	19.9	NG/ML		P4NP7S	225.6	NG/ML
496	M	59	172	1.72	76	25.6896	PINP	36.7	NG/ML		C1M	14.6	NG/ML		C3M	8	NG/ML		Pro-C3	6.7	NG/ML		C4M2	15.6	NG/ML		P4NP7S	161.6	NG/ML
497	M	55	182	1.82	83	25.0574	PINP	54.3	NG/ML		C1M	28.6	NG/ML		C3M	8	NG/ML		Pro-C3	5.7	NG/ML		C4M2	15.3	NG/ML		P4NP7S	158	NG/ML
498	M	58	169	1.69	78.7	27.5551	PINP	32.9	NG/ML		C1M	23.8	NG/ML		C3M	7.8	NG/ML		Pro-C3	9.6	NG/ML		C4M2	11	NG/ML		P4NP7S	127.6	NG/ML
499	M	48	184	1.84	90	26.5832	PINP	54.2	NG/ML		C1M	30.8	NG/ML		C3M	9.6	NG/ML		Pro-C3	9.5	NG/ML		C4M2	17.7	NG/ML		P4NP7S	193.3	NG/ML
500	M	57	166	1.66	76	27.5802	PINP	52	NG/ML		C1M	18.3	NG/ML		C3M	7.9	NG/ML		Pro-C3	6.4	NG/ML		C4M2	14.1	NG/ML		P4NP7S	169.1	NG/ML
501	M	59	179	1.79	86	26.8406	PINP	30.1	NG/ML		C1M	22.6	NG/ML		C3M	7.7	NG/ML		Pro-C3	6.3	NG/ML		C4M2	15.4	NG/ML		P4NP7S	158.2	NG/ML
502	M	59	178	1.78	78	24.6181	PINP	45.9	NG/ML		C1M	24.3	NG/ML		C3M	12.7	NG/ML		Pro-C3	7.9	NG/ML		C4M2	23	NG/ML		P4NP7S	282.4	NG/ML
503	M	55	184	1.84	101	29.8322	PINP	38.5	NG/ML		C1M	32.1	NG/ML		C3M	10	NG/ML		Pro-C3	6.3	NG/ML		C4M2	17.7	NG/ML		P4NP7S	212.2	NG/ML
504	M	60	177	1.77	79	25.2163	PINP	22.6	NG/ML		C1M	18.6	NG/ML		C3M	8.4	NG/ML		Pro-C3	6.2	NG/ML		C4M2	14.4	NG/ML		P4NP7S	146.8	NG/ML
505	M	48	184	1.84	89	26.2878	PINP	37.7	NG/ML		C1M	24.5	NG/ML		C3M	9.3	NG/ML		Pro-C3	5.3	NG/ML		C4M2	17.1	NG/ML		P4NP7S	169.6	NG/ML
506	M	58	169	1.69	70	24.5089	PINP	63	NG/ML		C1M	20.1	NG/ML		C3M	10.8	NG/ML		Pro-C3	9.5	NG/ML		C4M2	15.8	NG/ML		P4NP7S	175.6	NG/ML
507	M	57	180	1.8	97	29.9383	PINP	45.1	NG/ML		C1M	26	NG/ML		C3M	8.7	NG/ML		Pro-C3	8.2	NG/ML		C4M2	16.2	NG/ML		P4NP7S	207.5	NG/ML
508	M	56	179	1.79	83	25.9043	PINP	35.6	NG/ML		C1M	31.2	NG/ML		C3M	19.5	NG/ML		Pro-C3	6.2	NG/ML		C4M2	33.3	NG/ML		P4NP7S	502.6	NG/ML
509	M	58	176	1.76	82	26.4721	PINP	48.9	NG/ML		C1M	27	NG/ML		C3M	8.2	NG/ML		Pro-C3	8.2	NG/ML		C4M2	15.9	NG/ML		P4NP7S	156.1	NG/ML
510	M	51	175	1.75	82	26.7755	PINP	41.7	NG/ML		C1M	27.3	NG/ML		C3M	11.3	NG/ML		Pro-C3	7.4	NG/ML		C4M2	19.7	NG/ML		P4NP7S	212.3	NG/ML
511	M	55	192	1.92	87	23.6003	PINP	43.7	NG/ML		C1M	22.8	NG/ML		C3M	9.7	NG/ML		Pro-C3	7	NG/ML		C4M2	17.1	NG/ML		P4NP7S	206.7	NG/ML
512	W	46	171	1.71	62	21.2031	PINP	54.3	NG/ML		C1M	18.8	NG/ML		C3M	9.1	NG/ML		Pro-C3	10	NG/ML		C4M2	16.8	NG/ML		P4NP7S	178.2	NG/ML
513	M	54	181	1.81	106	32.3555	PINP	71.6	NG/ML		C1M	19.9	NG/ML		C3M	9.7	NG/ML		Pro-C3	6.2	NG/ML		C4M2	18.3	NG/ML		P4NP7S	199.5	NG/ML
514	W	50	166	1.66	58	21.048	PINP	64.8	NG/ML		C1M	27.5	NG/ML		C3M	8.6	NG/ML		Pro-C3	5.5	NG/ML		C4M2	12.9	NG/ML		P4NP7S	165.3	NG/ML
515	M	53	173	1.73	75	25.0593	PINP	25.1	NG/ML		C1M	29.9	NG/ML		C3M	10	NG/ML		Pro-C3	5.5	NG/ML		C4M2	23.9	NG/ML		P4NP7S	288.9	NG/ML
516	M	54	179	1.79	90	28.089	PINP	37.2	NG/ML		C1M	25.7	NG/ML		C3M	8.3	NG/ML		Pro-C3	7.3	NG/ML		C4M2	21.5	NG/ML		P4NP7S	195.5	NG/ML
517	M	52	181	1.81	78	23.8088	PINP	61.9	NG/ML		C1M	24.5	NG/ML		C3M	7.5	NG/ML		Pro-C3	6.6	NG/ML		C4M2	15.2	NG/ML		P4NP7S	167.4	NG/ML
518	M	49	172	1.72	90	30.4218	PINP	34.4	NG/ML		C1M	18.9	NG/ML		C3M	7.7	NG/ML		Pro-C3	6.6	NG/ML		C4M2	16.8	NG/ML		P4NP7S	176.1	NG/ML
519	M	51	171	1.71	71	24.281	PINP	42	NG/ML		C1M	18.5	NG/ML		C3M	9.4	NG/ML		Pro-C3	7.7	NG/ML		C4M2	21.3	NG/ML		P4NP7S	240.2	NG/ML
520	M	52	184	1.84	78.8	23.275	PINP	32	NG/ML		C1M	52.4	NG/ML		C3M	9.1	NG/ML		Pro-C3	8.3	NG/ML		C4M2	23.5	NG/ML		P4NP7S	276.1	NG/ML
521	M	51	175	1.75	80	26.1224	PINP	87.9	NG/ML		C1M	38.1	NG/ML		C3M	10.5	NG/ML		Pro-C3	5.1	NG/ML		C4M2	24.8	NG/ML		P4NP7S	287.8	NG/ML
522	W	41	164	1.64	62	23.0518	PINP	77.8	NG/ML		C1M	39.9	NG/ML		C3M	15.3	NG/ML		Pro-C3	12.5	NG/ML		C4M2	28.9	NG/ML		P4NP7S	354.3	NG/ML
523	W	48	167	1.67	95	34.0636	PINP	32	NG/ML		C1M	33	NG/ML		C3M	9.4	NG/ML		Pro-C3	7	NG/ML		C4M2	19.4	NG/ML		P4NP7S	195	NG/ML
524	W	42	164	1.64	58	21.5645	PINP	36.5	NG/ML		C1M	36.5	NG/ML		C3M	11.9	NG/ML		Pro-C3	6.8	NG/ML		C4M2	20.7	NG/ML		P4NP7S	250.4	NG/ML
525	W	49	167	1.67	89	31.9122	PINP	30.3	NG/ML		C1M	19.4	NG/ML		C3M	7.5	NG/ML		Pro-C3	8.4	NG/ML		C4M2	16.5	NG/ML		P4NP7S	157	NG/ML
526	W	50	165	1.65	61	22.4059	PINP	85.8	NG/ML		C1M	44	NG/ML		C3M	11.4	NG/ML		Pro-C3	4.7	NG/ML		C4M2	23.6	NG/ML		P4NP7S	269.6	NG/ML
527	W	48	155	1.55	79	32.8824	PINP	23.4	NG/ML		C1M	30.9	NG/ML		C3M	10.2	NG/ML		Pro-C3	26.9	NG/ML		C4M2	17.4	NG/ML		P4NP7S	214.5	NG/ML
528	M	51	188	1.88	101	28.5763	PINP	22	NG/ML		C1M	27.3	NG/ML		C3M	10.5	NG/ML		Pro-C3	7.9	NG/ML		C4M2	20.7	NG/ML		P4NP7S	246.6	NG/ML
529	W	49	162	1.62	70	26.6728	PINP	41.4	NG/ML		C1M	25.1	NG/ML		C3M	11.7	NG/ML		Pro-C3	8.6	NG/ML		C4M2	24.5	NG/ML		P4NP7S	305.1	NG/ML
530	W	50	165	1.65	72	26.4463	PINP	19	NG/ML		C1M	32	NG/ML		C3M	11.8	NG/ML		Pro-C3	7.1	NG/ML		C4M2	23.1	NG/ML		P4NP7S	282	NG/ML
531	W	45	171	1.71	80	27.3588	PINP	21.4	NG/ML		C1M	24.9	NG/ML		C3M	10.9	NG/ML		Pro-C3	7.3	NG/ML		C4M2	22.6	NG/ML		P4NP7S	265	NG/ML
532	W	49	162	1.62	51	19.433	PINP	12.8	NG/ML		C1M	33.7	NG/ML		C3M	8.6	NG/ML		Pro-C3	4	NG/ML		C4M2	20.7	NG/ML		P4NP7S	193.4	NG/ML
533	M	49	178	1.78	79	24.9337	PINP	52.5	NG/ML		C1M	15.5	NG/ML		C3M	7.9	NG/ML		Pro-C3	7.5	NG/ML		C4M2	16.9	NG/ML		P4NP7S	155.2	NG/ML
534	W	46	163	1.63	66	24.841	PINP	49.6	NG/ML		C1M	38.6	NG/ML		C3M	13.6	NG/ML		Pro-C3	7.5	NG/ML		C4M2	23.3	NG/ML		P4NP7S	301.8	NG/ML
535	W	57	160	1.6	50	19.5312	PINP	56.8	NG/ML		C1M	28	NG/ML		C3M	11.1	NG/ML		Pro-C3	5.7	NG/ML		C4M2	23.5	NG/ML		P4NP7S	262	NG/ML
536	W	49	177	1.77	58	18.5132	PINP	38.3	NG/ML		C1M	22	NG/ML		C3M	6.7	NG/ML		Pro-C3	4.4	NG/ML		C4M2	14.1	NG/ML		P4NP7S	138.2	NG/ML
537	M	42	164	1.64	80	29.7442	PINP	65.6	NG/ML		C1M	22.6	NG/ML		C3M	7.3	NG/ML		Pro-C3	9.5	NG/ML		C4M2	15.8	NG/ML		P4NP7S	151.2	NG/ML
538	M	47	173	1.73	74	24.7252	PINP	34	NG/ML		C1M	22.1	NG/ML		C3M	7.7	NG/ML		Pro-C3	8.3	NG/ML		C4M2	15.4	NG/ML		P4NP7S	138.4	NG/ML
539	M	49	169	1.69	76	26.6097	PINP	46	NG/ML		C1M	28.8	NG/ML		C3M	10.2	NG/ML		Pro-C3	6.6	NG/ML		C4M2	25.7	NG/ML		P4NP7S	252.5	NG/ML
540	M	48	170	1.7	78	26.9896	PINP	17.8	NG/ML		C1M	19.1	NG/ML		C3M	9.9	NG/ML		Pro-C3	5.6	NG/ML		C4M2	20.4	NG/ML		P4NP7S	207.7	NG/ML
541	W	48	177	1.77	78	24.8971	PINP	59.2	NG/ML		C1M	24	NG/ML		C3M	9	NG/ML		Pro-C3	9.1	NG/ML		C4M2	16.9	NG/ML		P4NP7S	158.5	NG/ML
542	M	56	174	1.74	85	28.075	PINP	118.6	NG/ML		C1M	26.3	NG/ML		C3M	9.2	NG/ML		Pro-C3	9.6	NG/ML		C4M2	19.1	NG/ML		P4NP7S	223.5	NG/ML
543	W	50	164	1.64	96	35.693	PINP	44.2	NG/ML		C1M	41.7	NG/ML		C3M	11.2	NG/ML		Pro-C3	12	NG/ML		C4M2	24.7	NG/ML		P4NP7S	283.2	NG/ML
544	W	49	156	1.56	76	31.2295	PINP	57.5	NG/ML		C1M	15.5	NG/ML		C3M	10.4	NG/ML		Pro-C3	6.6	NG/ML		C4M2	23.9	NG/ML		P4NP7S	281.7	NG/ML
545	M	49	180	1.8	84	25.9259	PINP	50.1	NG/ML		C1M	20.2	NG/ML		C3M	9.4	NG/ML		Pro-C3	7.5	NG/ML		C4M2	20.7	NG/ML		P4NP7S	206.9	NG/ML
546	M	49	175	1.75	74	24.1633	PINP	41.4	NG/ML		C1M	19.6	NG/ML		C3M	9.6	NG/ML		Pro-C3	4.9	NG/ML		C4M2	23.2	NG/ML		P4NP7S	225.4	NG/ML
547	M	47	181	1.81	92	28.0822	PINP	61.7	NG/ML		C1M	20.7	NG/ML		C3M	9.8	NG/ML		Pro-C3	5.7	NG/ML		C4M2	22.4	NG/ML		P4NP7S	223.3	NG/ML
548	M	42	179	1.79	81	25.2801	PINP	150.8	NG/ML		C1M	27.4	NG/ML		C3M	11.2	NG/ML		Pro-C3	7.5	NG/ML		C4M2	27	NG/ML		P4NP7S	309.8	NG/ML
549	W	49	168	1.68	58	20.5499	PINP	35.6	NG/ML		C1M	15.9	NG/ML		C3M	11.3	NG/ML		Pro-C3	4	NG/ML		C4M2	23.9	NG/ML		P4NP7S	250.2	NG/ML
550	M	52	178	1.78	85	26.8274	PINP	35.2	NG/ML		C1M	22.2	NG/ML		C3M	9.3	NG/ML		Pro-C3	6	NG/ML		C4M2	23.1	NG/ML		P4NP7S	256.5	NG/ML
551	W	47	165	1.65	62	22.7732	PINP	61.1	NG/ML		C1M	17.8	NG/ML		C3M	6.8	NG/ML		Pro-C3	6	NG/ML		C4M2	14	NG/ML		P4NP7S	125.1	NG/ML
552	M	47	193	1.93	101	27.1148	PINP	62.2	NG/ML		C1M	34.7	NG/ML		C3M	11	NG/ML		Pro-C3	8.7	NG/ML		C4M2	25.5	NG/ML		P4NP7S	323.9	NG/ML
553	M	49	177	1.77	93	29.685	PINP	50.4	NG/ML		C1M	24.6	NG/ML		C3M	7.3	NG/ML		Pro-C3	7.9	NG/ML		C4M2	18.7	NG/ML		P4NP7S	191.8	NG/ML
554	M	50	183	1.83	83	24.7843	PINP	35.7	NG/ML		C1M	41	NG/ML		C3M	13.2	NG/ML		Pro-C3	7	NG/ML		C4M2	32.9	NG/ML		P4NP7S	369.7	NG/ML
555	M	50	180	1.8	88	27.1605	PINP	48.1	NG/ML		C1M	18	NG/ML		C3M	5.7	NG/ML		Pro-C3	5.3	NG/ML		C4M2	14	NG/ML		P4NP7S	133.1	NG/ML
556	M	50	174	1.74	57	18.8268	PINP	67.1	NG/ML		C1M	17.1	NG/ML		C3M	7.4	NG/ML		Pro-C3	7.5	NG/ML		C4M2	15.8	NG/ML		P4NP7S	166.3	NG/ML
557	M	47	186	1.86	87	25.1474	PINP	76.1	NG/ML		C1M	30.9	NG/ML		C3M	8.6	NG/ML		Pro-C3	7.2	NG/ML		C4M2	18.8	NG/ML		P4NP7S	220.2	NG/ML
558	W	48	158	1.58	82	32.8473	PINP	38.4	NG/ML		C1M	33.7	NG/ML		C3M	10.4	NG/ML		Pro-C3	6.5	NG/ML		C4M2	21.9	NG/ML		P4NP7S	287.5	NG/ML
559	M	47	177	1.77	69	22.0243	PINP	67.4	NG/ML		C1M	21	NG/ML		C3M	9.9	NG/ML		Pro-C3	6.7	NG/ML		C4M2	17.9	NG/ML		P4NP7S	253.2	NG/ML
560	W	43	167	1.67	75	26.8923	PINP	42.9	NG/ML		C1M	25.1	NG/ML		C3M	13.6	NG/ML		Pro-C3	7.9	NG/ML		C4M2	27.9	NG/ML		P4NP7S	358.6	NG/ML
561	M	44	178	1.78	93	29.3524	PINP	68.6	NG/ML		C1M	41	NG/ML		C3M	8.6	NG/ML		Pro-C3	8.5	NG/ML		C4M2	20.1	NG/ML		P4NP7S	225.3	NG/ML
562	W	46	146	1.46	77	36.1231	PINP	64.5	NG/ML		C1M	20.9	NG/ML		C3M	7.9	NG/ML		Pro-C3	8	NG/ML		C4M2	17.1	NG/ML		P4NP7S	191.4	NG/ML
563	M	47	173	1.73	78	26.0617	PINP	22.6	NG/ML		C1M	70.9	NG/ML		C3M	6.4	NG/ML		Pro-C3	4	NG/ML	BELOW LOWER LIMIT OF QUANTIFICATION	C4M2	17.2	NG/ML		P4NP7S	198.1	NG/ML
564	W	40	171	1.71	72	24.623	PINP	58.1	NG/ML		C1M	34.5	NG/ML		C3M	7.7	NG/ML		Pro-C3	9	NG/ML		C4M2	14	NG/ML		P4NP7S	188.1	NG/ML
565	M	42	183	1.83	122	36.4299	PINP	42.6	NG/ML		C1M	26.9	NG/ML		C3M	7.6	NG/ML		Pro-C3	7.8	NG/ML		C4M2	16.3	NG/ML		P4NP7S	200.5	NG/ML
566	M	44	183	1.83	83	24.7843	PINP	89.2	NG/ML		C1M	34.2	NG/ML		C3M	9.8	NG/ML		Pro-C3	6.8	NG/ML		C4M2	21.9	NG/ML		P4NP7S	245.9	NG/ML
567	W	46	162	1.62	65	24.7676	PINP	21	NG/ML		C1M	27.6	NG/ML		C3M	10.9	NG/ML		Pro-C3	5.1	NG/ML		C4M2	22.3	NG/ML		P4NP7S	292.4	NG/ML
568	W	45	177	1.77	66	21.0667	PINP	21.5	NG/ML		C1M	26.8	NG/ML		C3M	7.5	NG/ML		Pro-C3	5.9	NG/ML		C4M2	14.8	NG/ML		P4NP7S	160	NG/ML
569	W	48	161	1.61	54	20.8325	PINP	26.8	NG/ML		C1M	29.8	NG/ML		C3M	7.2	NG/ML		Pro-C3	7.9	NG/ML		C4M2	11.6	NG/ML		P4NP7S	133.9	NG/ML
570	M	42	187	1.87	91	26.023	PINP	44.5	NG/ML		C1M	22.7	NG/ML		C3M	9.9	NG/ML		Pro-C3	8.3	NG/ML		C4M2	18.6	NG/ML		P4NP7S	243.6	NG/ML
571	W	45	156	1.56	68	27.9421	PINP	18.9	NG/ML		C1M	40.6	NG/ML		C3M	9.5	NG/ML		Pro-C3	5.7	NG/ML		C4M2	17.4	NG/ML		P4NP7S	208	NG/ML
572	M	49	182	1.82	83	25.0574	PINP	55	NG/ML		C1M	21.8	NG/ML		C3M	7.2	NG/ML		Pro-C3	7.3	NG/ML		C4M2	16.5	NG/ML		P4NP7S	185.4	NG/ML
573	M	44	172	1.72	70	23.6614	PINP	44.7	NG/ML		C1M	18.5	NG/ML		C3M	7.4	NG/ML		Pro-C3	8.8	NG/ML		C4M2	13.1	NG/ML		P4NP7S	163.8	NG/ML
574	W	50	168	1.68	68	24.093	PINP	73	NG/ML		C1M	26	NG/ML		C3M	8.2	NG/ML		Pro-C3	6.1	NG/ML		C4M2	19.5	NG/ML		P4NP7S	193	NG/ML
575	W	45	168	1.68	76	26.9274	PINP	39.3	NG/ML		C1M	28.4	NG/ML		C3M	9.7	NG/ML		Pro-C3	4.8	NG/ML		C4M2	19.4	NG/ML		P4NP7S	207.2	NG/ML
576	M	47	199	1.99	101	25.5044	PINP	100.1	NG/ML		C1M	21.8	NG/ML		C3M	12.1	NG/ML		Pro-C3	7.8	NG/ML		C4M2	26.9	NG/ML		P4NP7S	297.5	NG/ML
577	W	45	173	1.73	77	25.7276	PINP	87.3	NG/ML		C1M	22.3	NG/ML		C3M	8.8	NG/ML		Pro-C3	6.8	NG/ML		C4M2	21.3	NG/ML		P4NP7S	217.8	NG/ML
578	W	48	168	1.68	78	27.6361	PINP	51.7	NG/ML		C1M	24.9	NG/ML		C3M	7.8	NG/ML		Pro-C3	5.4	NG/ML		C4M2	17.6	NG/ML		P4NP7S	167.2	NG/ML
579	W	44	161	1.61	87	33.5635	PINP	35.9	NG/ML		C1M	49.8	NG/ML		C3M	9.3	NG/ML		Pro-C3	6.3	NG/ML		C4M2	21.9	NG/ML		P4NP7S	225	NG/ML
580	W	47	159	1.59	76	30.0621	PINP	59.5	NG/ML		C1M	22.8	NG/ML		C3M	7.3	NG/ML		Pro-C3	6.8	NG/ML		C4M2	15.1	NG/ML		P4NP7S	172.5	NG/ML
581	W	42	162	1.62	81	30.8642	PINP	40.7	NG/ML		C1M	22.8	NG/ML		C3M	9.1	NG/ML		Pro-C3	6.8	NG/ML		C4M2	15.4	NG/ML		P4NP7S	209	NG/ML
582	W	43	166	1.66	69	25.0399	PINP	31.5	NG/ML		C1M	19.2	NG/ML		C3M	8.1	NG/ML		Pro-C3	5.5	NG/ML		C4M2	17.9	NG/ML		P4NP7S	174.7	NG/ML
583	W	43	168	1.68	50	17.7154	PINP	19.7	NG/ML		C1M	20	NG/ML		C3M	9.9	NG/ML		Pro-C3	4.6	NG/ML		C4M2	21.5	NG/ML		P4NP7S	236.7	NG/ML
584	W	44	163	1.63	84	31.6158	PINP	24.7	NG/ML		C1M	22.7	NG/ML		C3M	7.1	NG/ML		Pro-C3	8.5	NG/ML		C4M2	16.9	NG/ML		P4NP7S	149.8	NG/ML
585	W	40	167	1.67	51.3	18.3943	PINP	37.5	NG/ML		C1M	17	NG/ML		C3M	6.3	NG/ML		Pro-C3	7.7	NG/ML		C4M2	12.5	NG/ML		P4NP7S	133.2	NG/ML
586	M	41	191	1.91	89	24.3963	PINP	60.4	NG/ML		C1M	22.4	NG/ML		C3M	8.3	NG/ML		Pro-C3	4.9	NG/ML		C4M2	19.7	NG/ML		P4NP7S	227.5	NG/ML
587	M	41	175	1.75	81	26.449	PINP	80.7	NG/ML		C1M	31.6	NG/ML		C3M	6.9	NG/ML		Pro-C3	8.6	NG/ML		C4M2	15.3	NG/ML		P4NP7S	149	NG/ML
588	W	44	164	1.64	89	33.0904	PINP	21.1	NG/ML		C1M	31	NG/ML		C3M	9	NG/ML		Pro-C3	5.8	NG/ML		C4M2	21.9	NG/ML		P4NP7S	231	NG/ML
589	W	41	171	1.71	56	19.1512	PINP	53.1	NG/ML		C1M	15.6	NG/ML		C3M	7.9	NG/ML		Pro-C3	9.1	NG/ML		C4M2	17.5	NG/ML		P4NP7S	168.3	NG/ML
590	W	45	180	1.8	89	27.4691	PINP	27.9	NG/ML		C1M	21.9	NG/ML		C3M	7.4	NG/ML		Pro-C3	8.2	NG/ML		C4M2	16.7	NG/ML		P4NP7S	161.1	NG/ML
591	M	45	178	1.78	85	26.8274	PINP	21.8	NG/ML		C1M	23	NG/ML		C3M	6.8	NG/ML		Pro-C3	4.9	NG/ML		C4M2	17.9	NG/ML		P4NP7S	154.4	NG/ML
592	M	43	182	1.82	92	27.7744	PINP	50.3	NG/ML		C1M	30.2	NG/ML		C3M	8.5	NG/ML		Pro-C3	7.6	NG/ML		C4M2	19.4	NG/ML		P4NP7S	190.6	NG/ML
593	W	44	183	1.83	85	25.3815	PINP	92.7	NG/ML		C1M	18.2	NG/ML		C3M	9.1	NG/ML		Pro-C3	9.2	NG/ML		C4M2	17	NG/ML		P4NP7S	177.5	NG/ML
594	M	43	169	1.69	87	30.4611	PINP	46.8	NG/ML		C1M	23.8	NG/ML		C3M	9.3	NG/ML		Pro-C3	7	NG/ML		C4M2	25.2	NG/ML		P4NP7S	224.4	NG/ML
595	M	42	176	1.76	103	33.2515	PINP	56.6	NG/ML		C1M	16.7	NG/ML		C3M	7.5	NG/ML		Pro-C3	9.2	NG/ML		C4M2	16.6	NG/ML		P4NP7S	165.5	NG/ML
596	M	41	175	1.75	73	23.8367	PINP	83.1	NG/ML		C1M	27.7	NG/ML		C3M	13.8	NG/ML		Pro-C3	6.3	NG/ML		C4M2	28.2	NG/ML		P4NP7S	433.1	NG/ML
597	M	44	188	1.88	98	27.7275	PINP	55.8	NG/ML		C1M	19.6	NG/ML		C3M	7.2	NG/ML		Pro-C3	12	NG/ML		C4M2	17.2	NG/ML		P4NP7S	174.9	NG/ML
598	M	43	164	1.64	53	19.7055	PINP	45.7	NG/ML		C1M	31	NG/ML		C3M	6.6	NG/ML		Pro-C3	6.1	NG/ML		C4M2	13.5	NG/ML		P4NP7S	143.2	NG/ML
599	M	44	186	1.86	88	25.4365	PINP	56.3	NG/ML		C1M		NG/ML		C3M	15.5	NG/ML		Pro-C3	14.1	NG/ML		C4M2	37.6	NG/ML		P4NP7S	479.7	NG/ML
600	M	44	179	1.79	78	24.3438	PINP	39.9	NG/ML		C1M	18.1	NG/ML		C3M	7.1	NG/ML		Pro-C3	7.4	NG/ML		C4M2	14.9	NG/ML		P4NP7S	139	NG/ML
601	M	41	176	1.76	103	33.2515	PINP	36.5	NG/ML		C1M	29.8	NG/ML		C3M	8.8	NG/ML		Pro-C3	5.8	NG/ML		C4M2	17.6	NG/ML		P4NP7S	173.8	NG/ML
602	W	43	173	1.73	73	24.3911	PINP	23.4	NG/ML		C1M	30.6	NG/ML		C3M	7.8	NG/ML		Pro-C3	5.3	NG/ML		C4M2	15.7	NG/ML		P4NP7S	134.8	NG/ML
603	M	43	195	1.95	117	30.7692	PINP	51.1	NG/ML		C1M	24.7	NG/ML		C3M	7.9	NG/ML		Pro-C3	7.3	NG/ML		C4M2	16	NG/ML		P4NP7S	147.8	NG/ML
604	W	42	171	1.71	62	21.2031	PINP	42	NG/ML		C1M	22.8	NG/ML		C3M	11.5	NG/ML		Pro-C3	7.8	NG/ML		C4M2	25.5	NG/ML		P4NP7S	286.4	NG/ML
605	W	43	162	1.62	70	26.6728	PINP	64.8	NG/ML		C1M	18	NG/ML		C3M	9.9	NG/ML		Pro-C3	11.3	NG/ML		C4M2	20.7	NG/ML		P4NP7S	226	NG/ML
606	W	43	170	1.7	68	23.5294	PINP	47.3	NG/ML		C1M	20.1	NG/ML		C3M	8.1	NG/ML		Pro-C3	8	NG/ML		C4M2	17.2	NG/ML		P4NP7S	153.3	NG/ML
607	W	40	170	1.7	73	25.2595	PINP	185.6	NG/ML		C1M	13.2	NG/ML	BELOW LOWER LIMIT OF QUANTIFICATION	C3M	9.2	NG/ML		Pro-C3	8.8	NG/ML		C4M2	20.1	NG/ML		P4NP7S	189.7	NG/ML
608	W	44	169	1.69	68	23.8087	PINP	18.2	NG/ML		C1M	28.4	NG/ML		C3M	16.4	NG/ML		Pro-C3	6.3	NG/ML		C4M2	36.7	NG/ML		P4NP7S	404.3	NG/ML
609	M	44	179	1.79	84	26.2164	PINP	57.1	NG/ML		C1M	34.2	NG/ML		C3M	10	NG/ML		Pro-C3	11.6	NG/ML		C4M2	21.7	NG/ML		P4NP7S	201.4	NG/ML
610	W	42	157	1.57	51	20.6905	PINP	31.9	NG/ML		C1M	17.2	NG/ML		C3M	6.3	NG/ML		Pro-C3	12.9	NG/ML		C4M2	12.3	NG/ML		P4NP7S	124.1	NG/ML
611	W	43	163	1.63	55	20.7008	PINP	36.3	NG/ML		C1M	17.9	NG/ML		C3M	8.4	NG/ML		Pro-C3	10.4	NG/ML		C4M2	20.3	NG/ML		P4NP7S	196.9	NG/ML
612	W	40	178	1.78	71	22.4088	PINP	32.9	NG/ML		C1M	34.5	NG/ML		C3M	14.2	NG/ML		Pro-C3	11.4	NG/ML		C4M2	32.3	NG/ML		P4NP7S	341.6	NG/ML
613	W	40	176	1.76	65	20.984	PINP	18.1	NG/ML		C1M	18.8	NG/ML		C3M	8.3	NG/ML		Pro-C3	8.3	NG/ML		C4M2	17.5	NG/ML		P4NP7S	175.9	NG/ML
614	W	44	168	1.68	70	24.8016	PINP	28.2	NG/ML		C1M	19.6	NG/ML		C3M	9.4	NG/ML		Pro-C3	8.1	NG/ML		C4M2	19.8	NG/ML		P4NP7S	205.6	NG/ML
615	M	40	172	1.72	79	26.7036	PINP	59.4	NG/ML		C1M	18.2	NG/ML		C3M	7.2	NG/ML		Pro-C3	5.7	NG/ML		C4M2	17.2	NG/ML		P4NP7S	141.7	NG/ML
616	W	42	168	1.68	55	19.487	PINP	38.3	NG/ML		C1M	21.6	NG/ML		C3M	7.9	NG/ML		Pro-C3	7.3	NG/ML		C4M2	14.7	NG/ML		P4NP7S	157.3	NG/ML
617	W	43	162	1.62	55	20.9572	PINP	60.5	NG/ML		C1M	16	NG/ML		C3M	6.9	NG/ML		Pro-C3	7	NG/ML		C4M2	15.9	NG/ML		P4NP7S	132.8	NG/ML
